# Supplementary material for: Study of the colonic epithelial-mesenchymal dialogue through establishment of two activated or not mesenchymal cell lines: Activated and resting ones differentially modulate colonocytes in co-culture
Source: PubMed Central journal article supplement (PMC9426876; doi:10.1371/journal.pone.0273858), 2022-08-30

## Characterization of nF and mF cell lines

$\alpha$ -SMA (42 kDa)

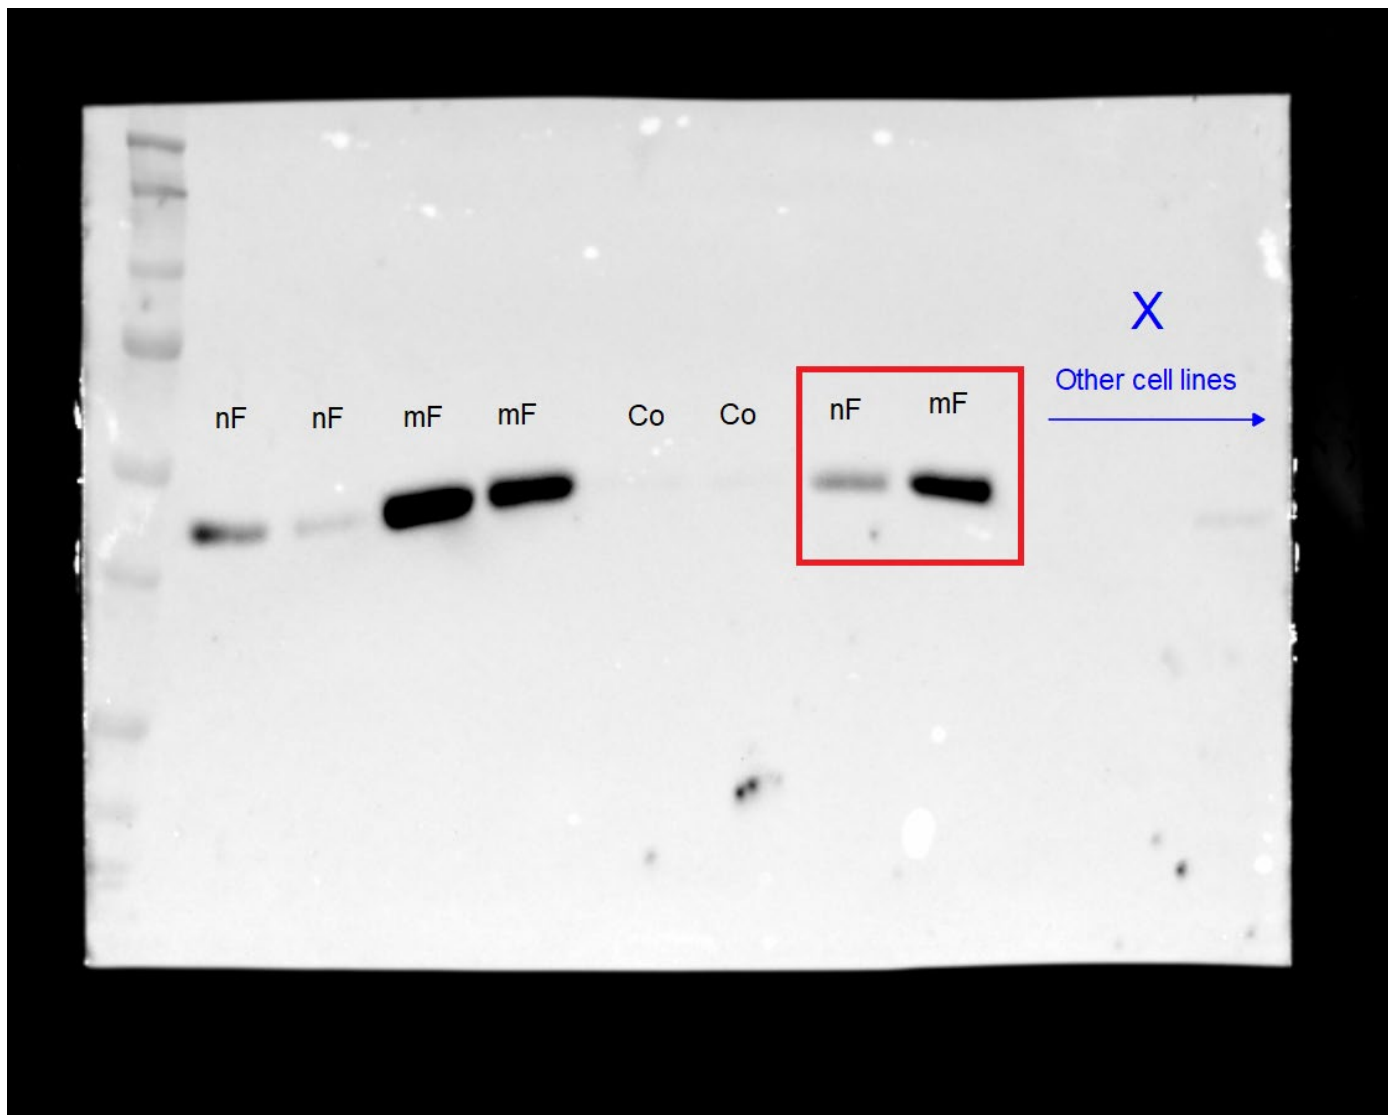

HSC70 for  $\alpha$ SMA, vimentin and cytokeratin 18

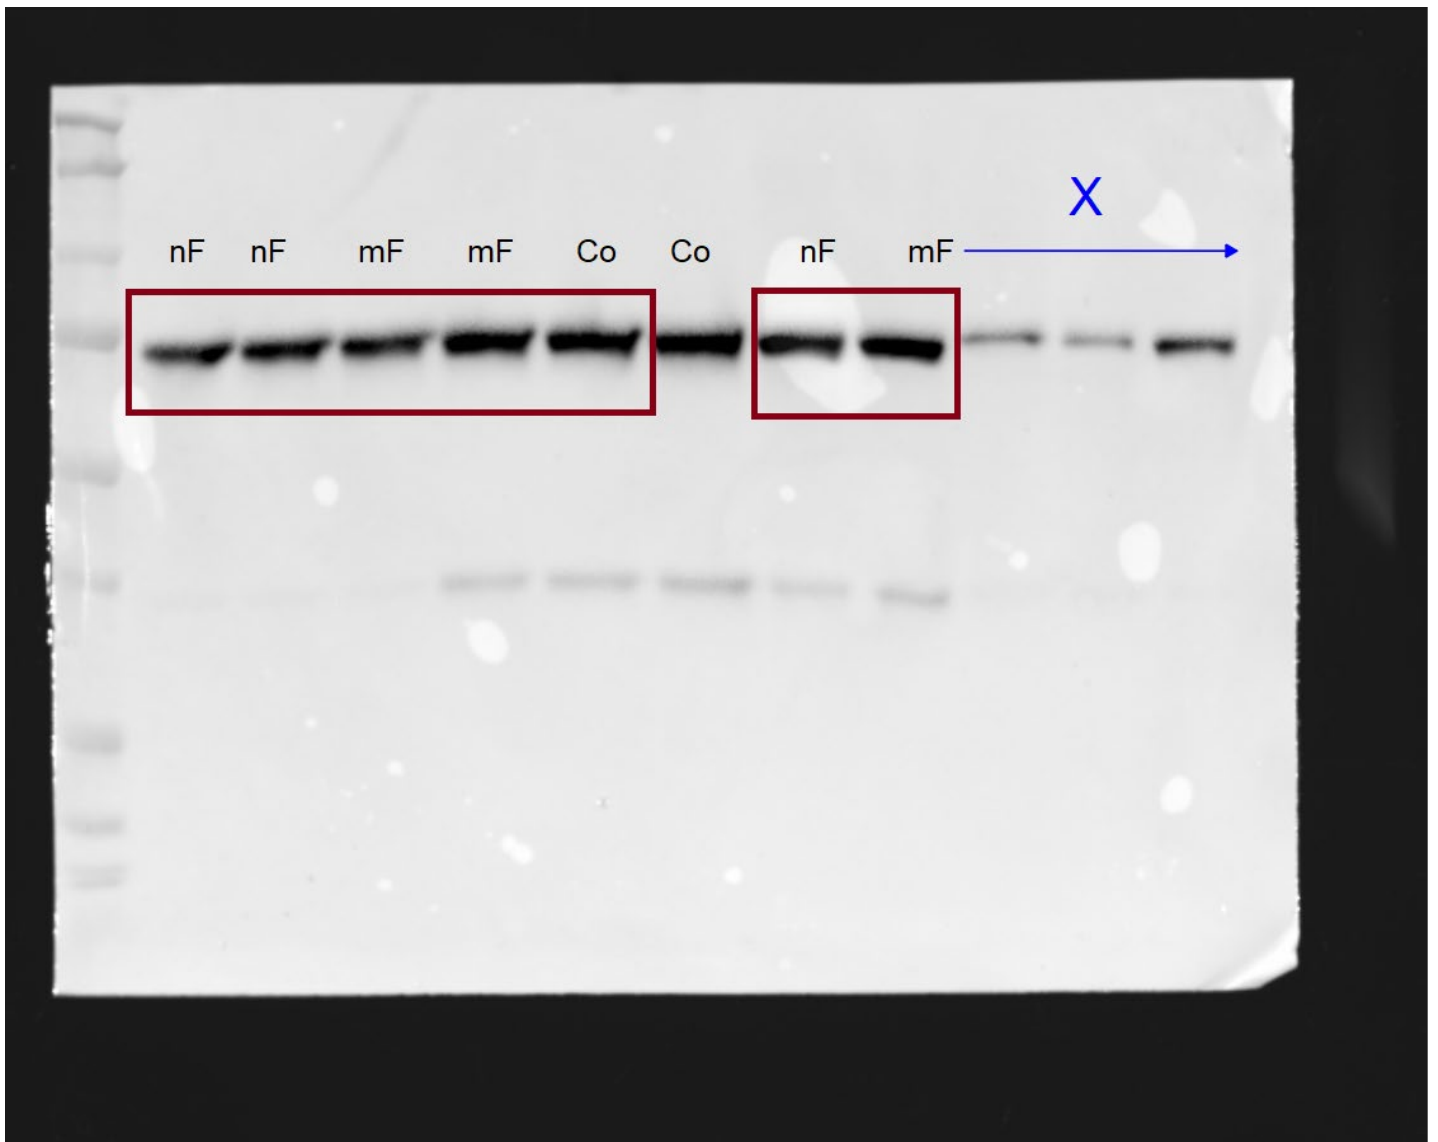

Cytokeratin 18 (45 kDa)

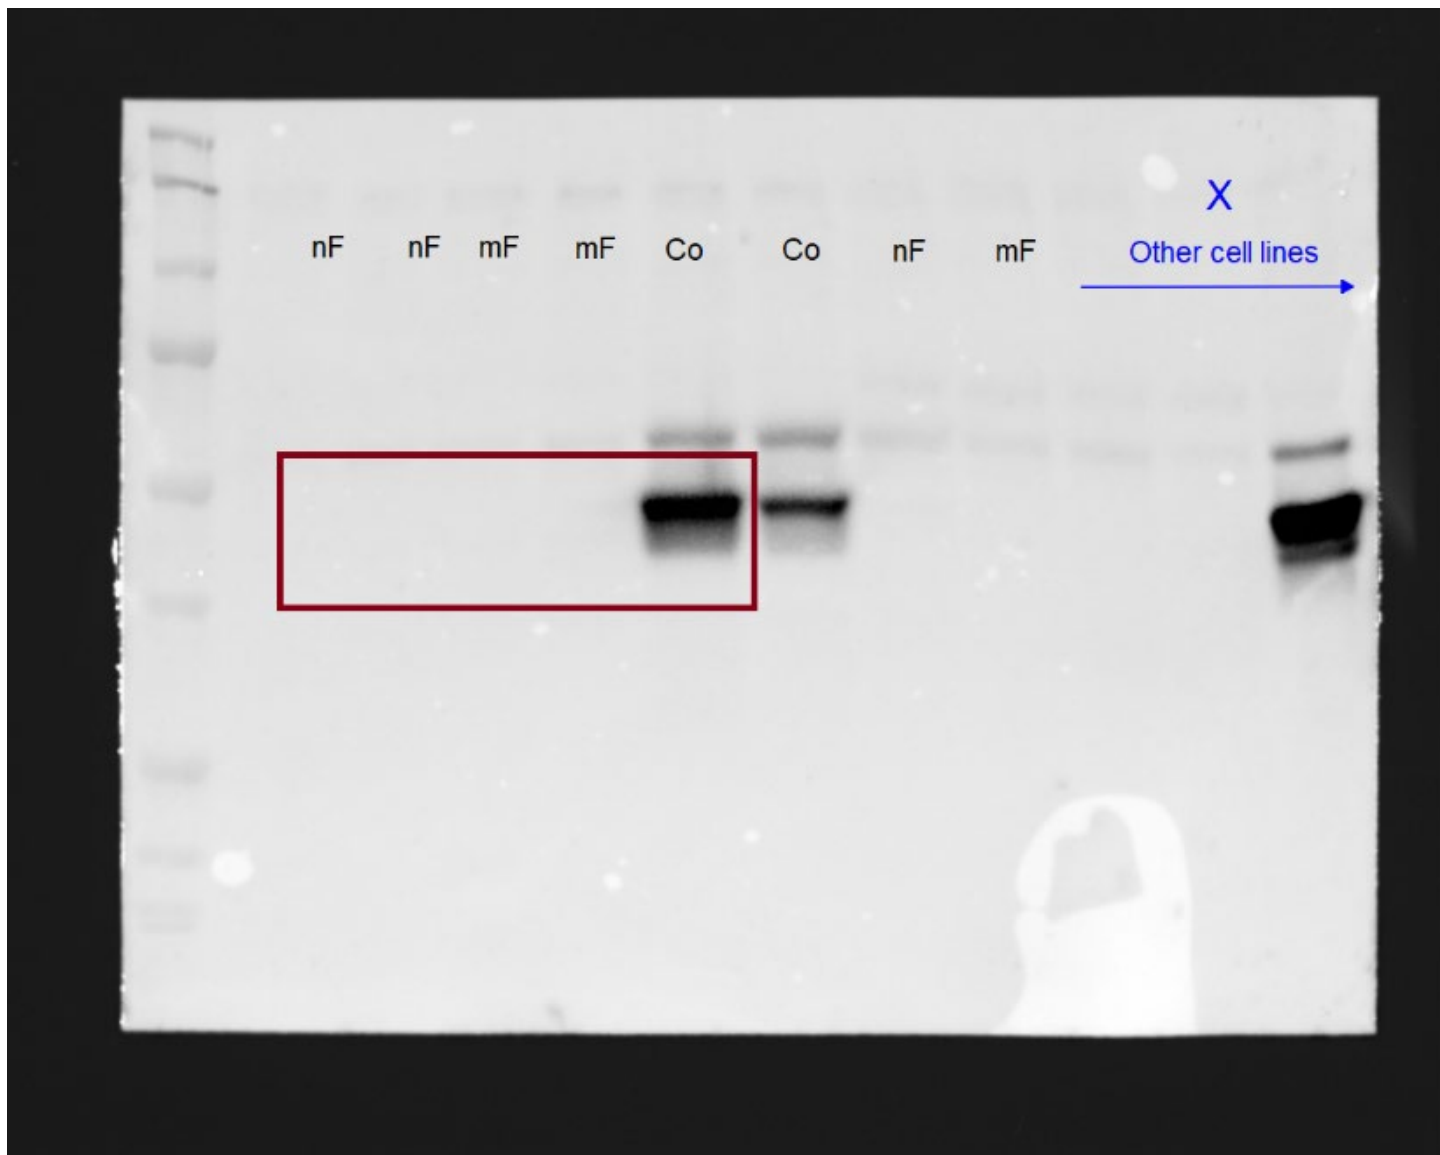

Vimentin (54 kDa)

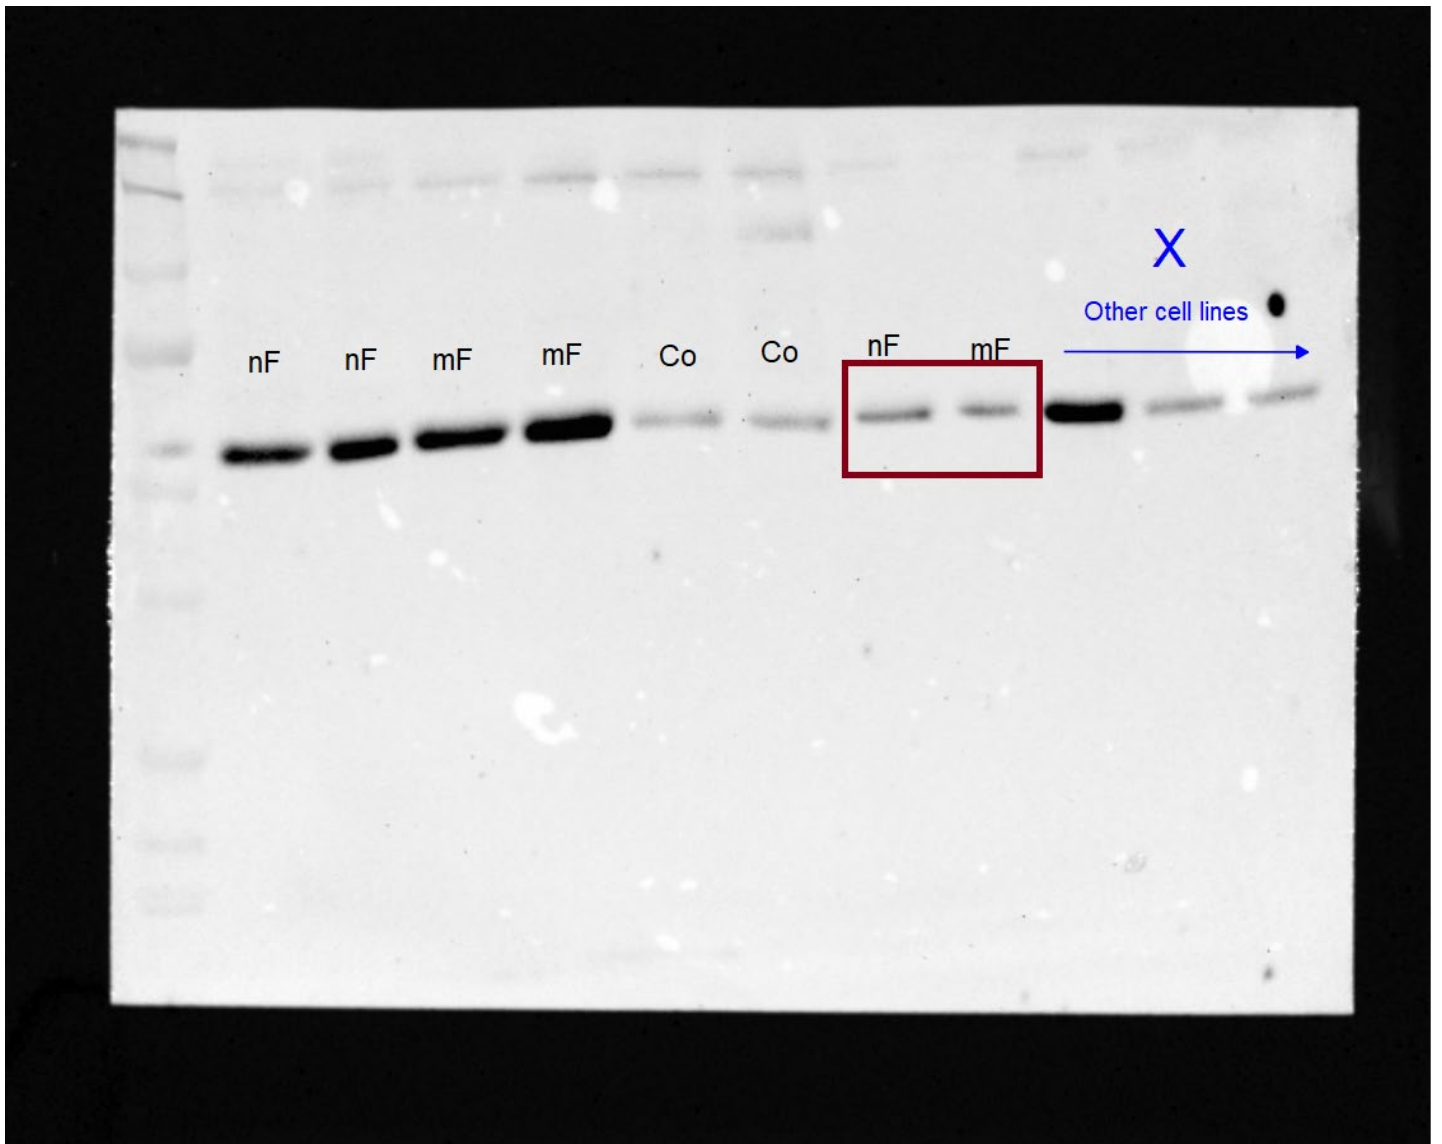

FAP (approx. 95 kDa)

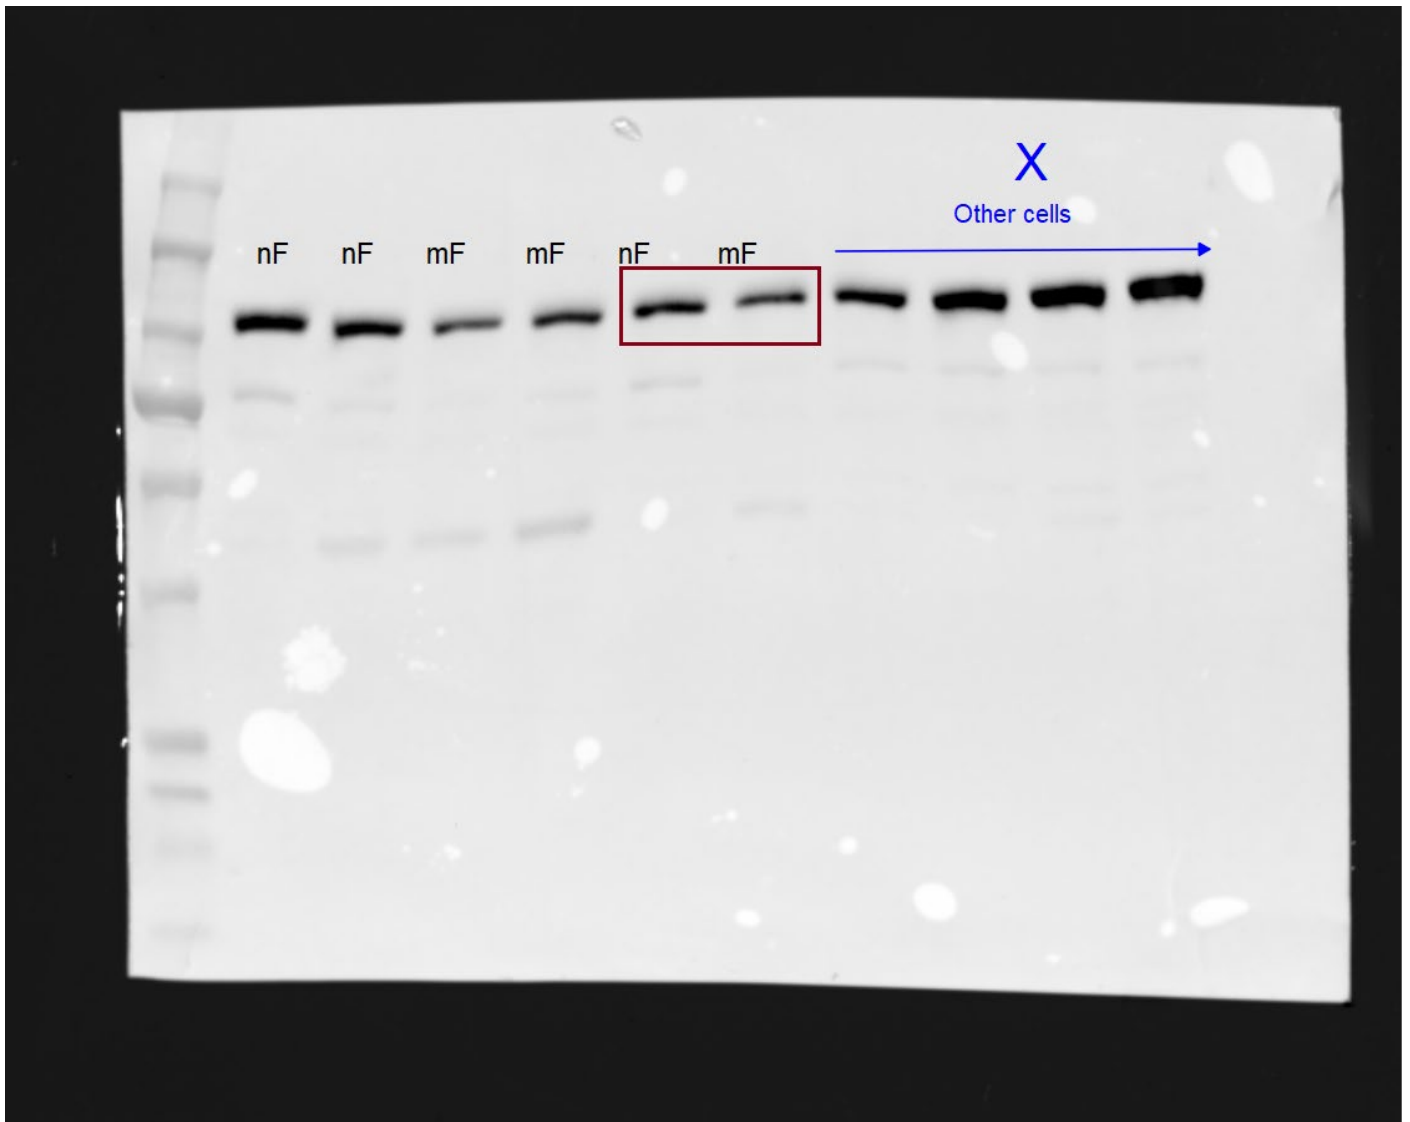

HSC70 for FAP

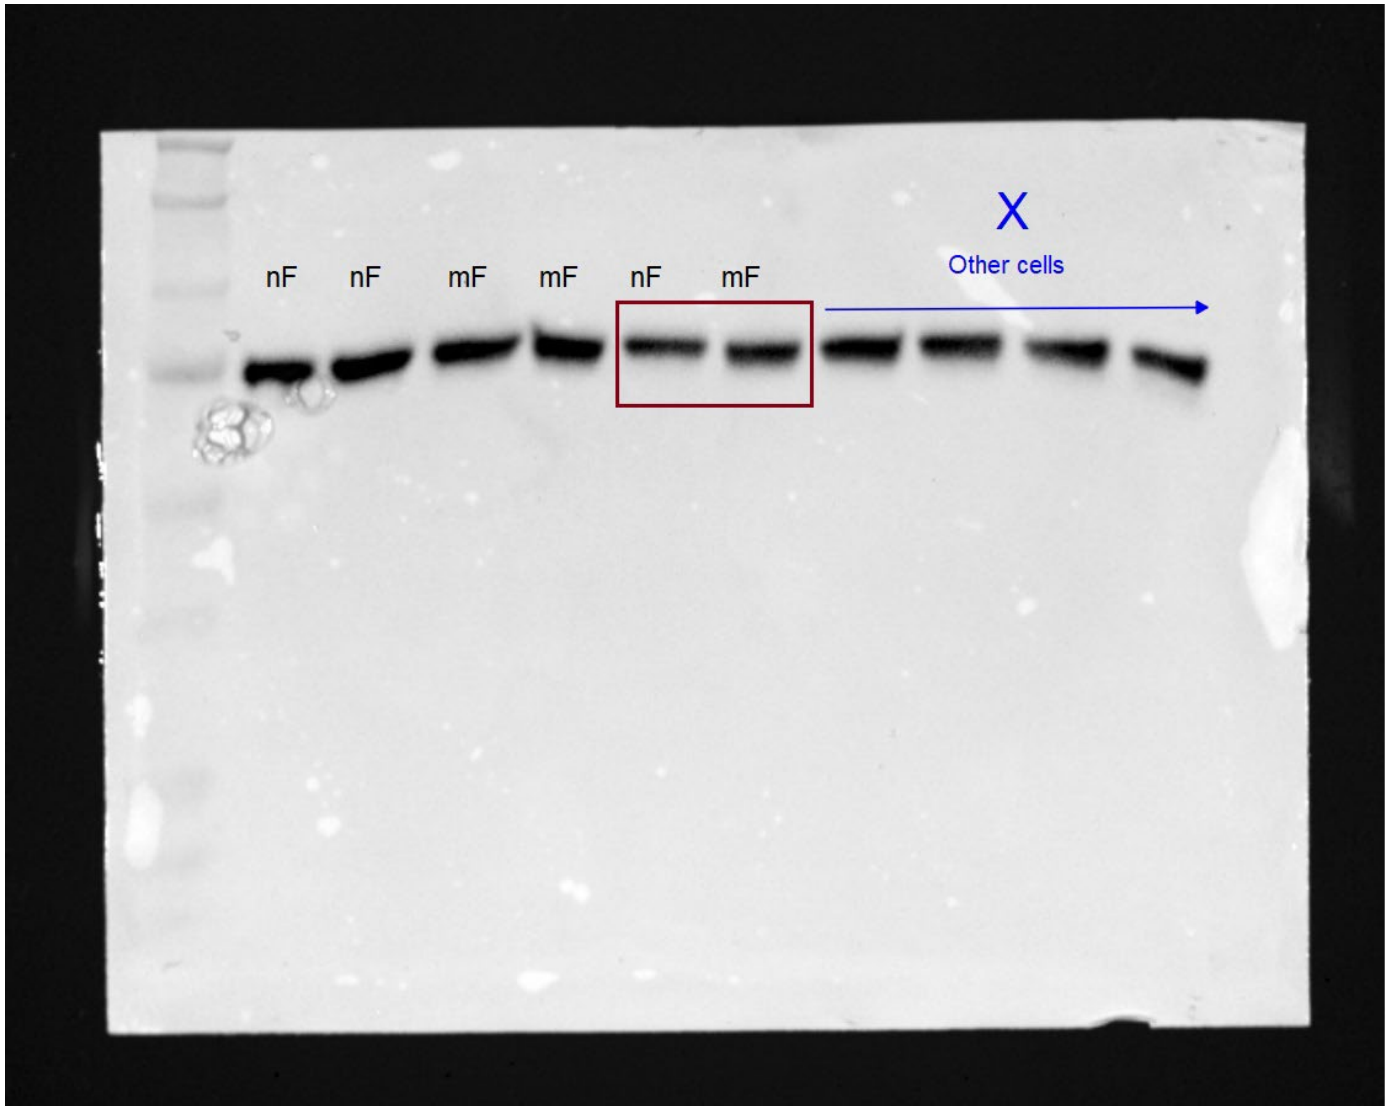

Effect of nF and mF fibroblasts on the phenotype of colonocytes

Cytokeratin 18 (45 kDa)

Blot 1

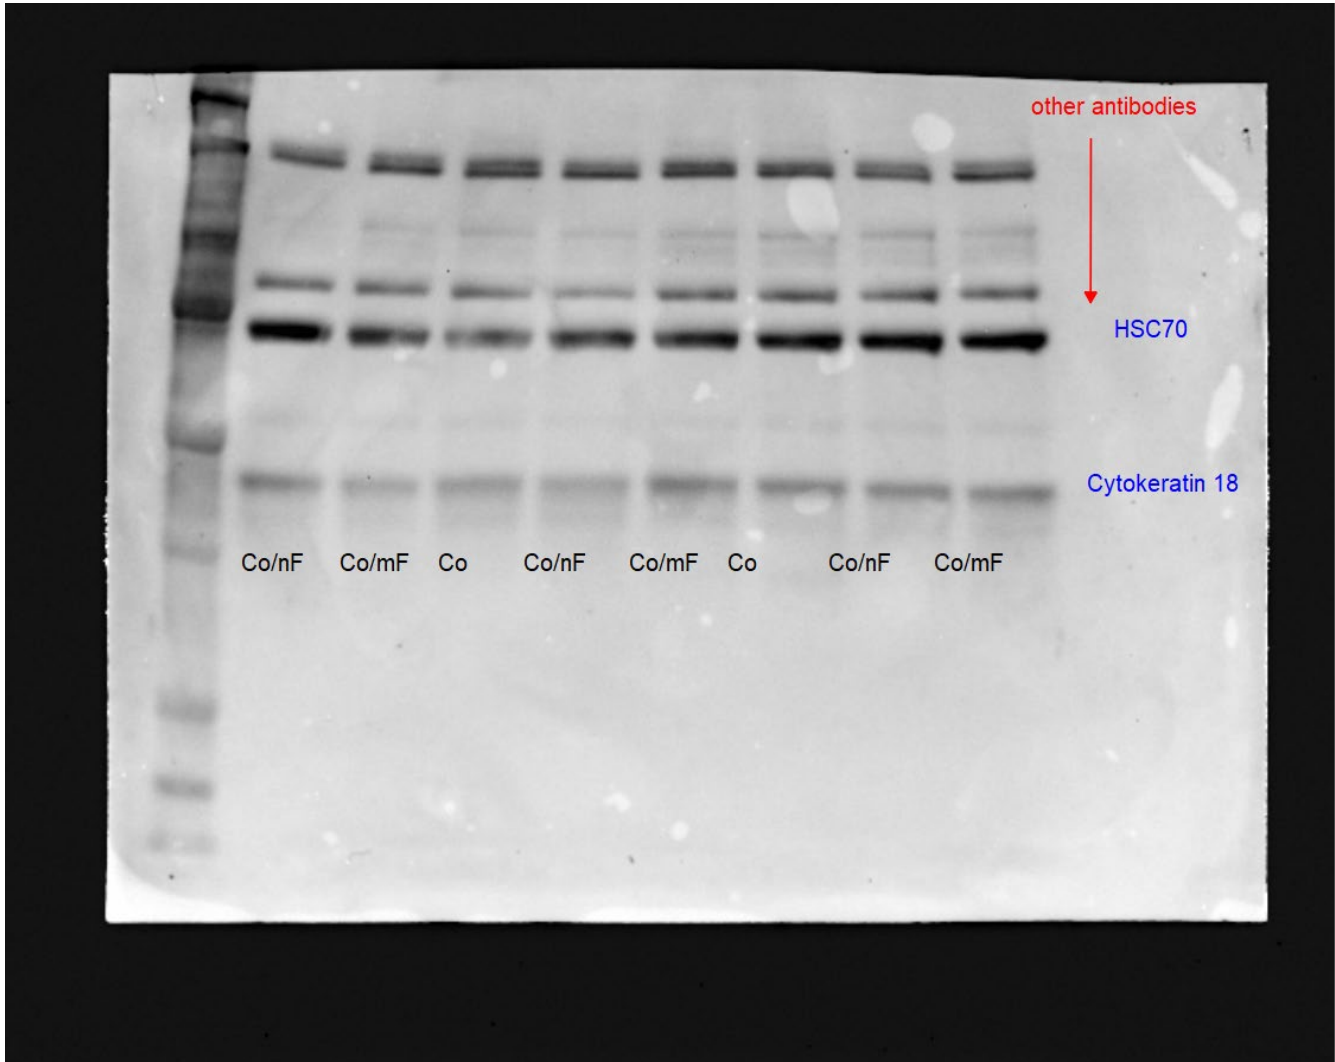

Cytokeratin 18: Blot 2

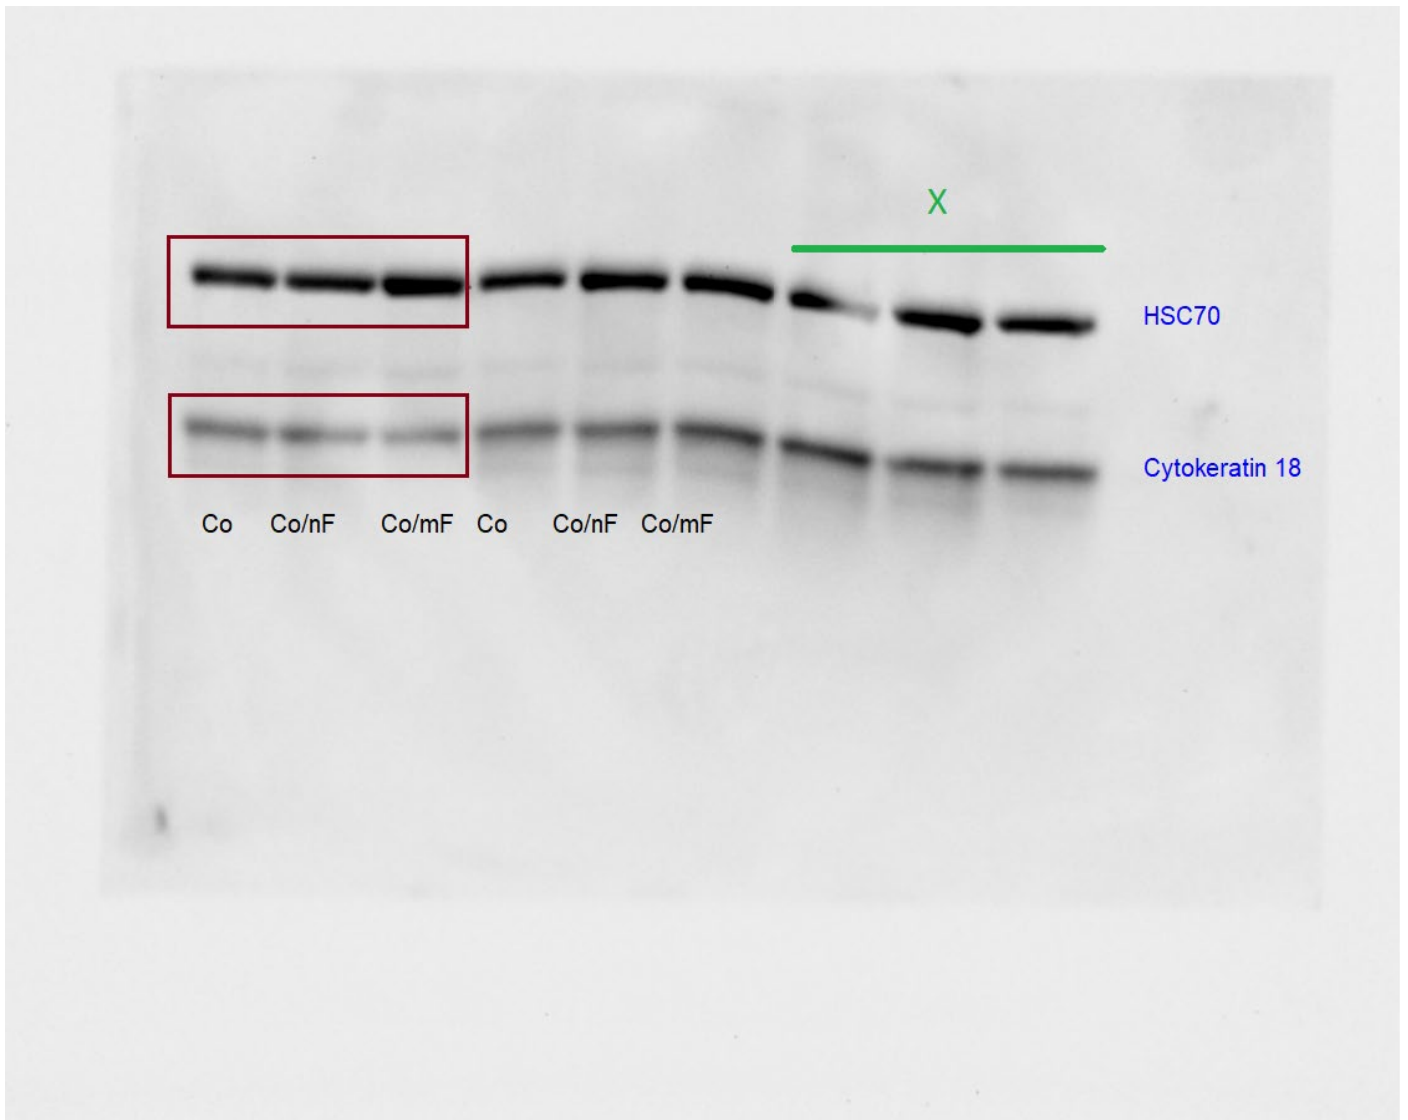



E-cadherin (approx. 120 kDa)

Blot 1

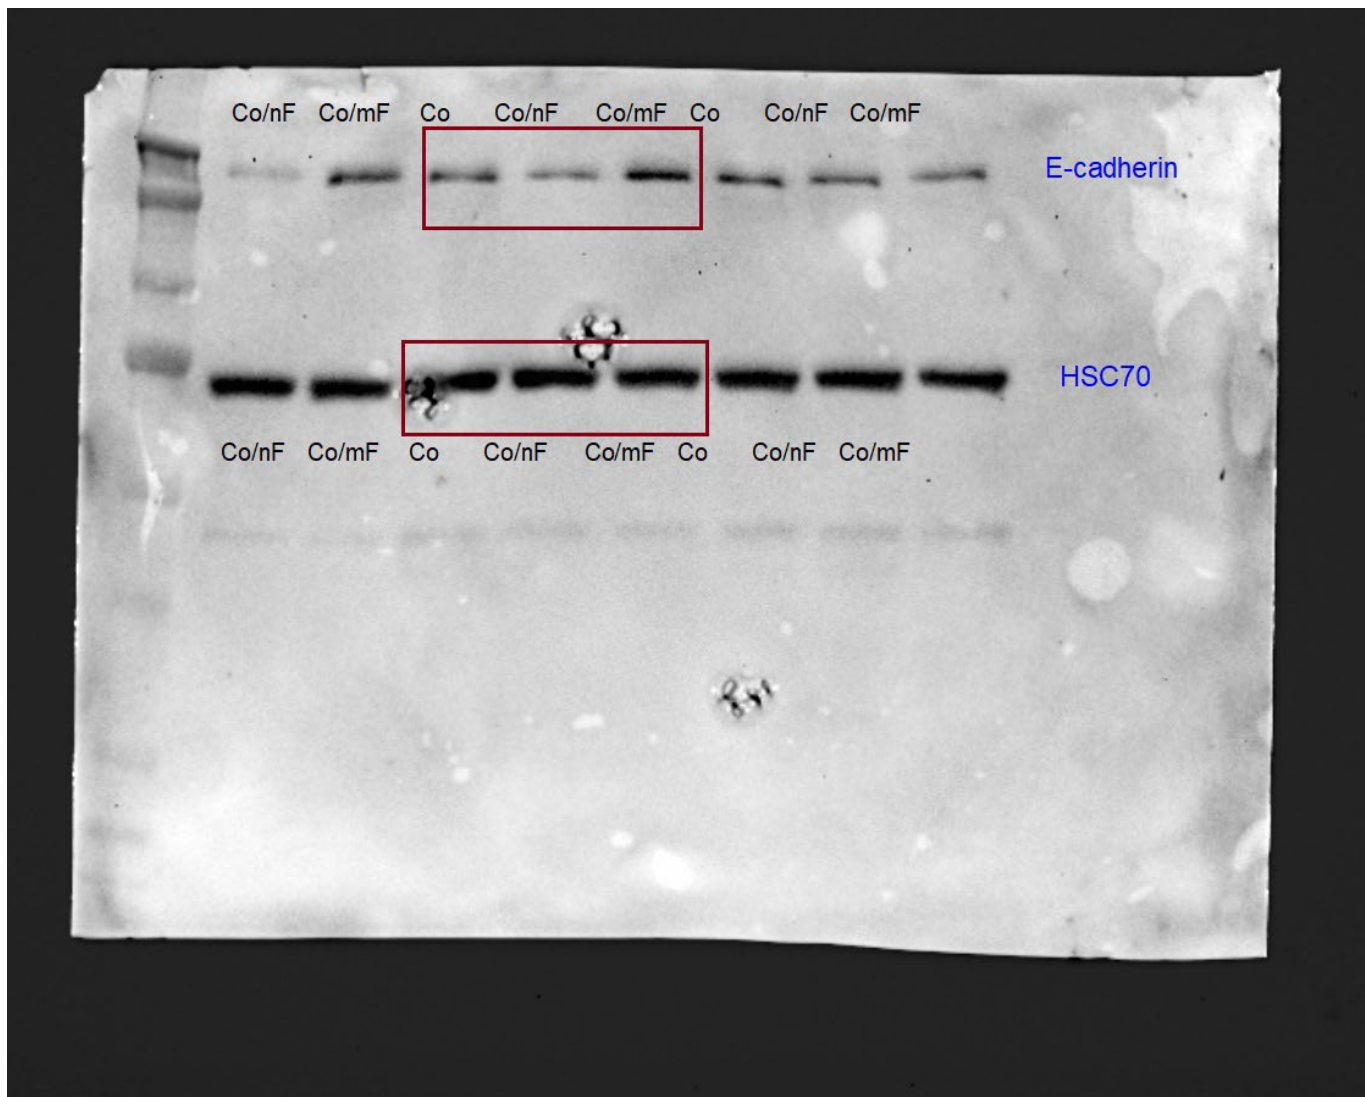

Blot 2 E-cadherin

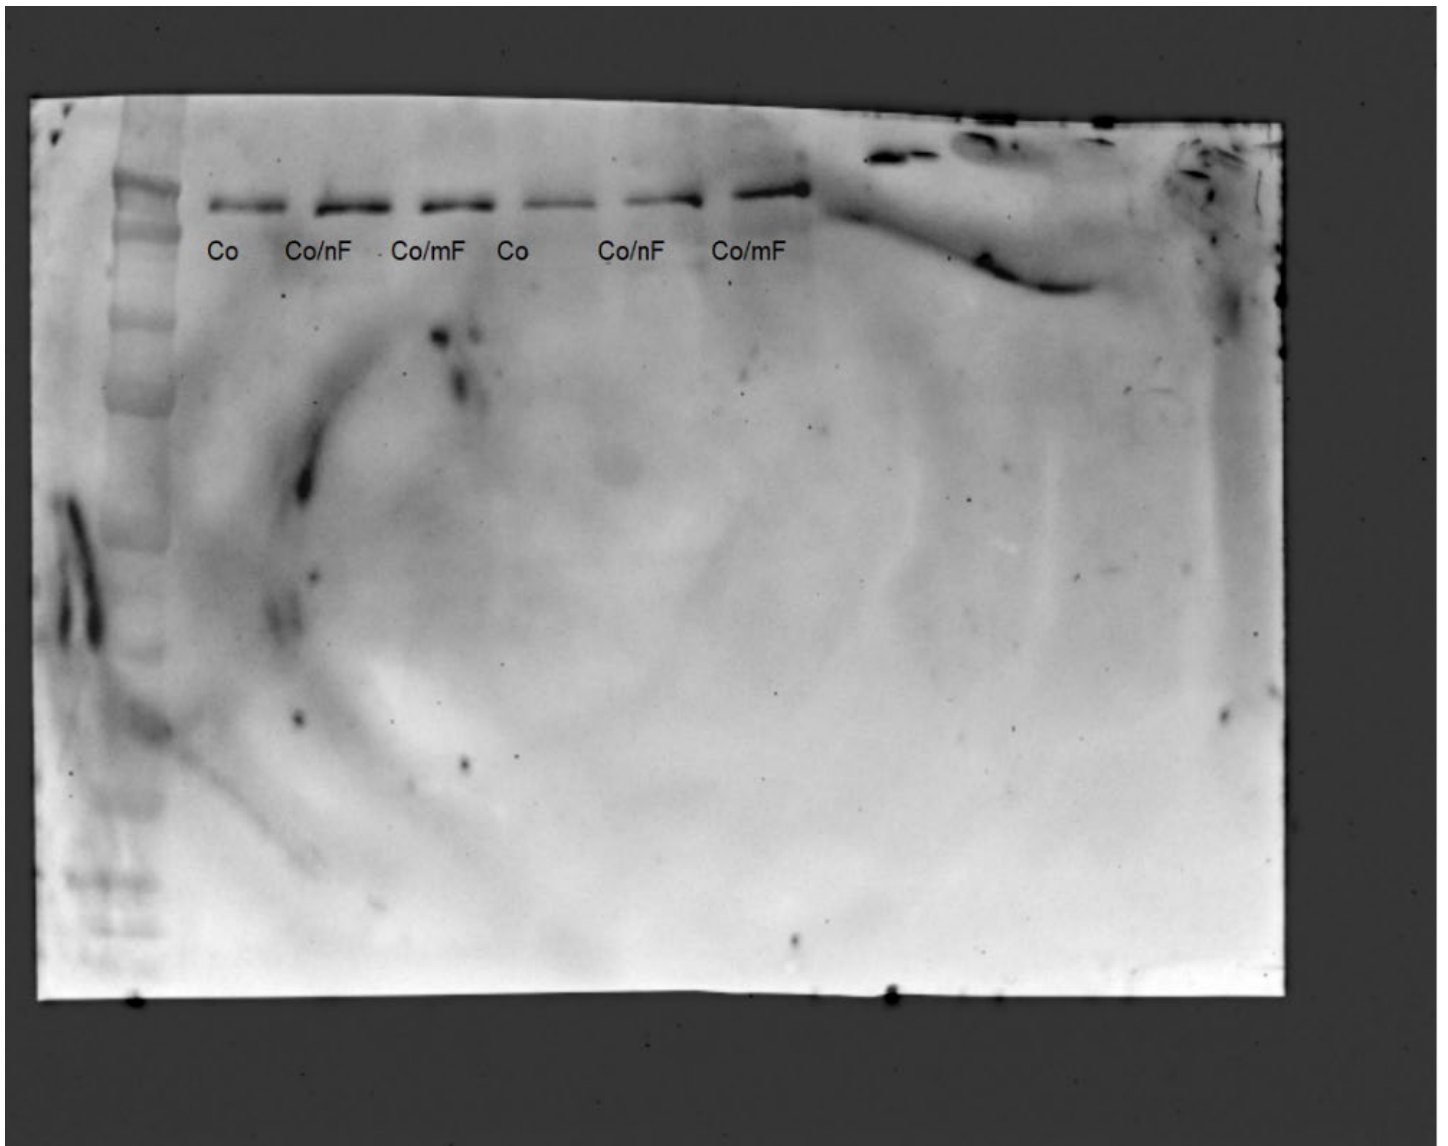

HSC70 for blot 2

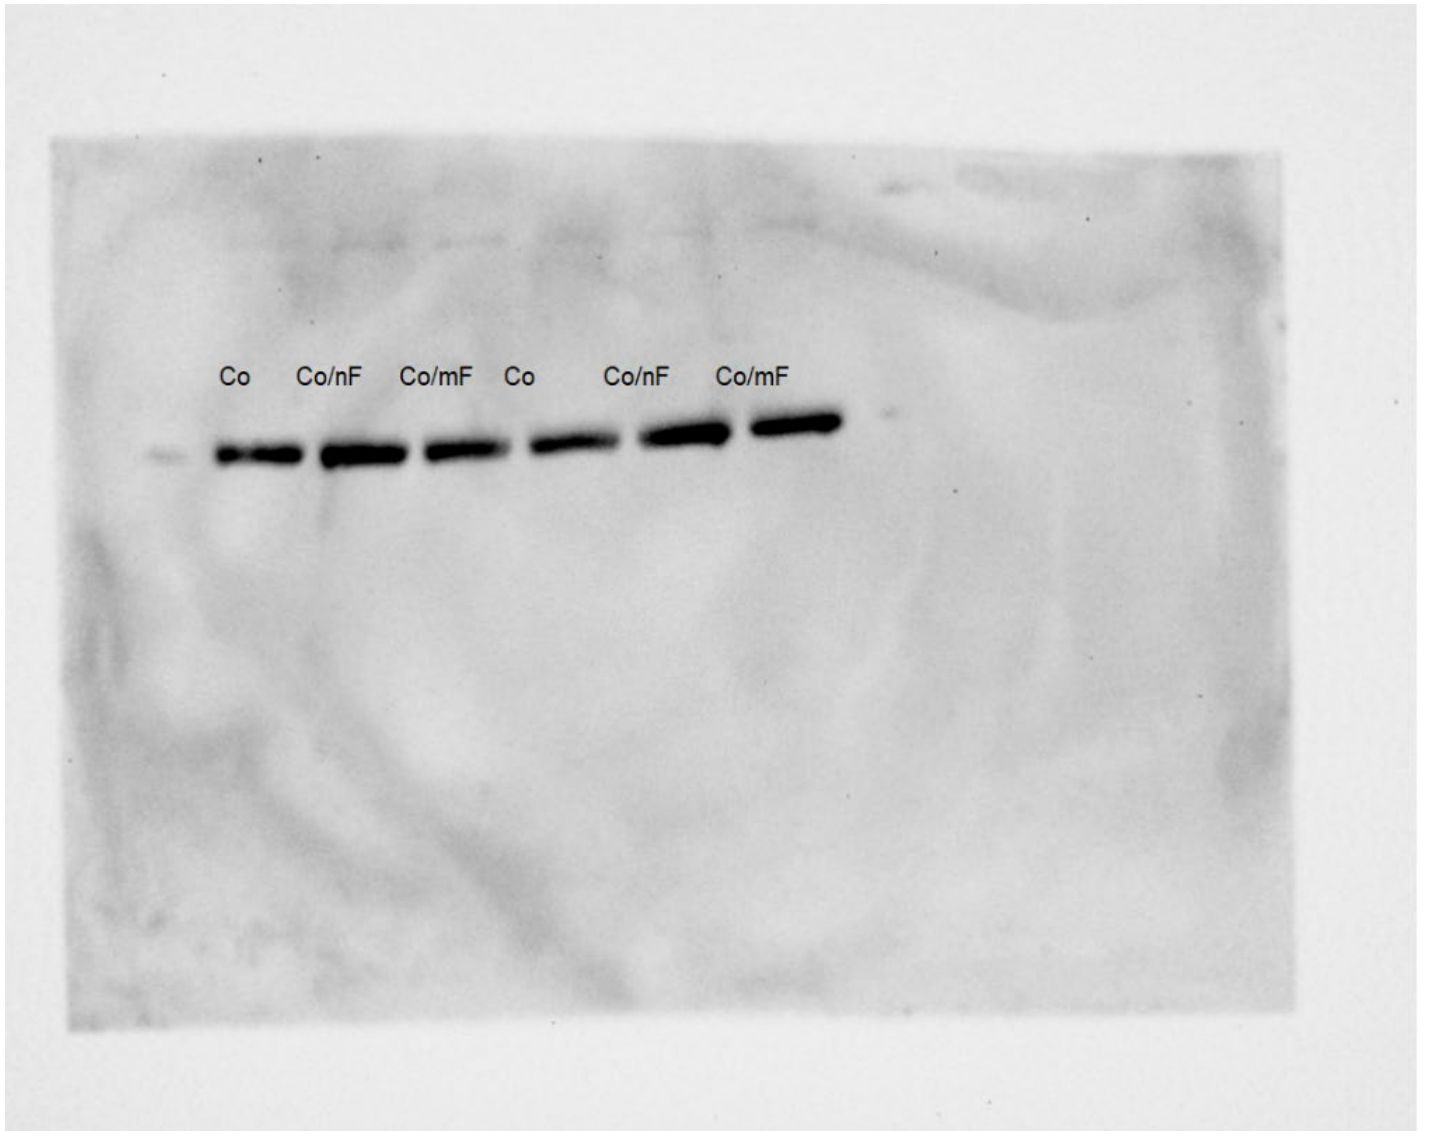

## LGR5 100 kDa

### Blot 1

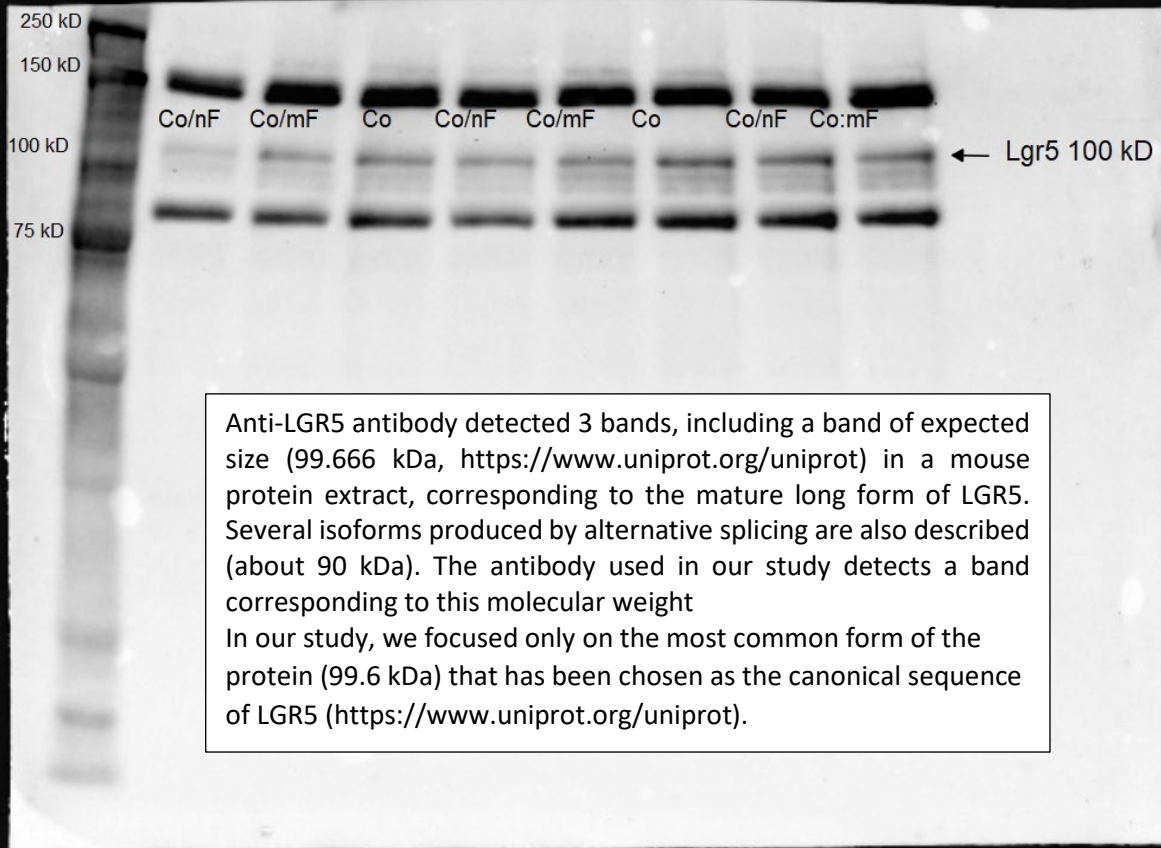

Anti-LGR5 antibody detected 3 bands, including a band of expected size (99.666 kDa, <https://www.uniprot.org/uniprot>) in a mouse protein extract, corresponding to the mature long form of LGR5. Several isoforms produced by alternative splicing are also described (about 90 kDa). The antibody used in our study detects a band corresponding to this molecular weight  
In our study, we focused only on the most common form of the protein (99.6 kDa) that has been chosen as the canonical sequence of LGR5 (<https://www.uniprot.org/uniprot>).

HSC70 for Lgr5

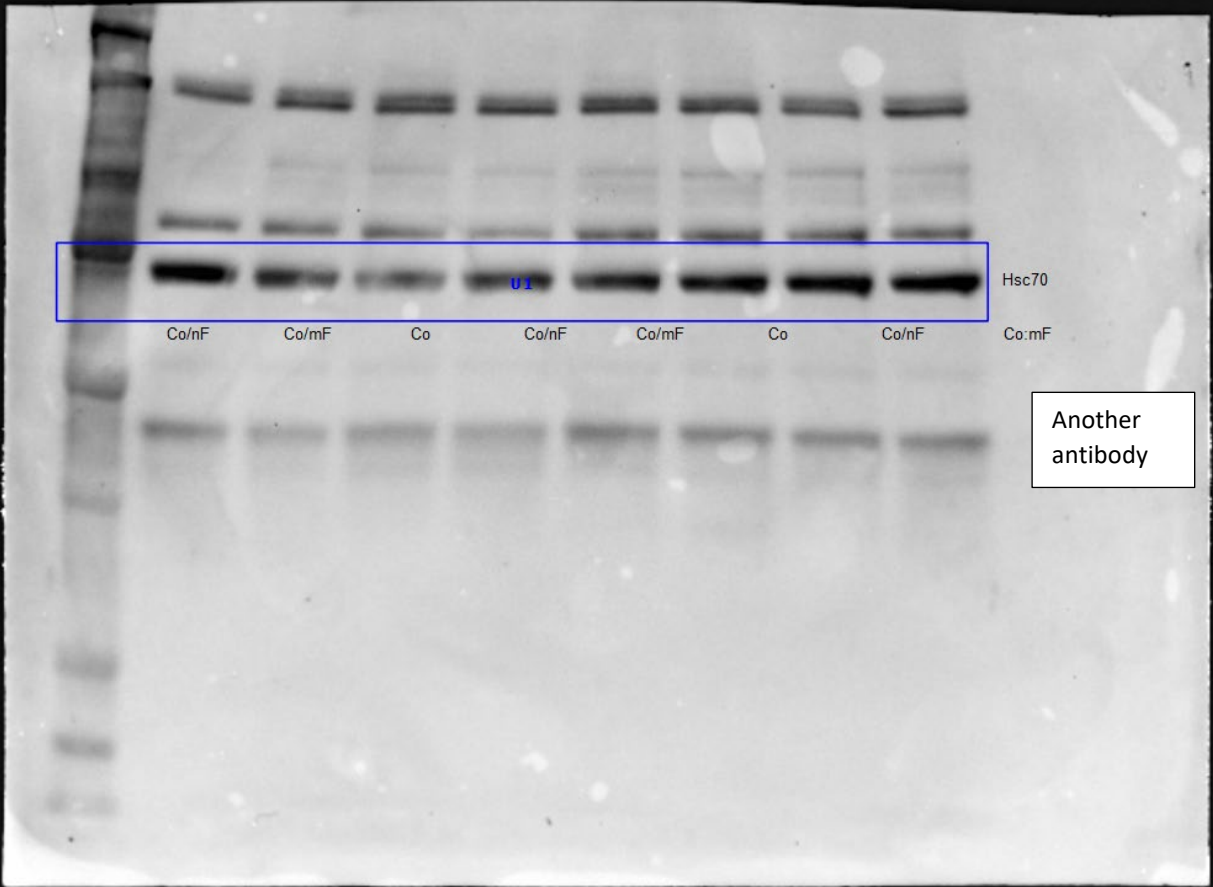

Expression of fibroblastic markers in nF and mF cells growth in direct coculture with Co colonocytes

$\alpha$ -SMA

$\alpha$ SMA: Blot 1

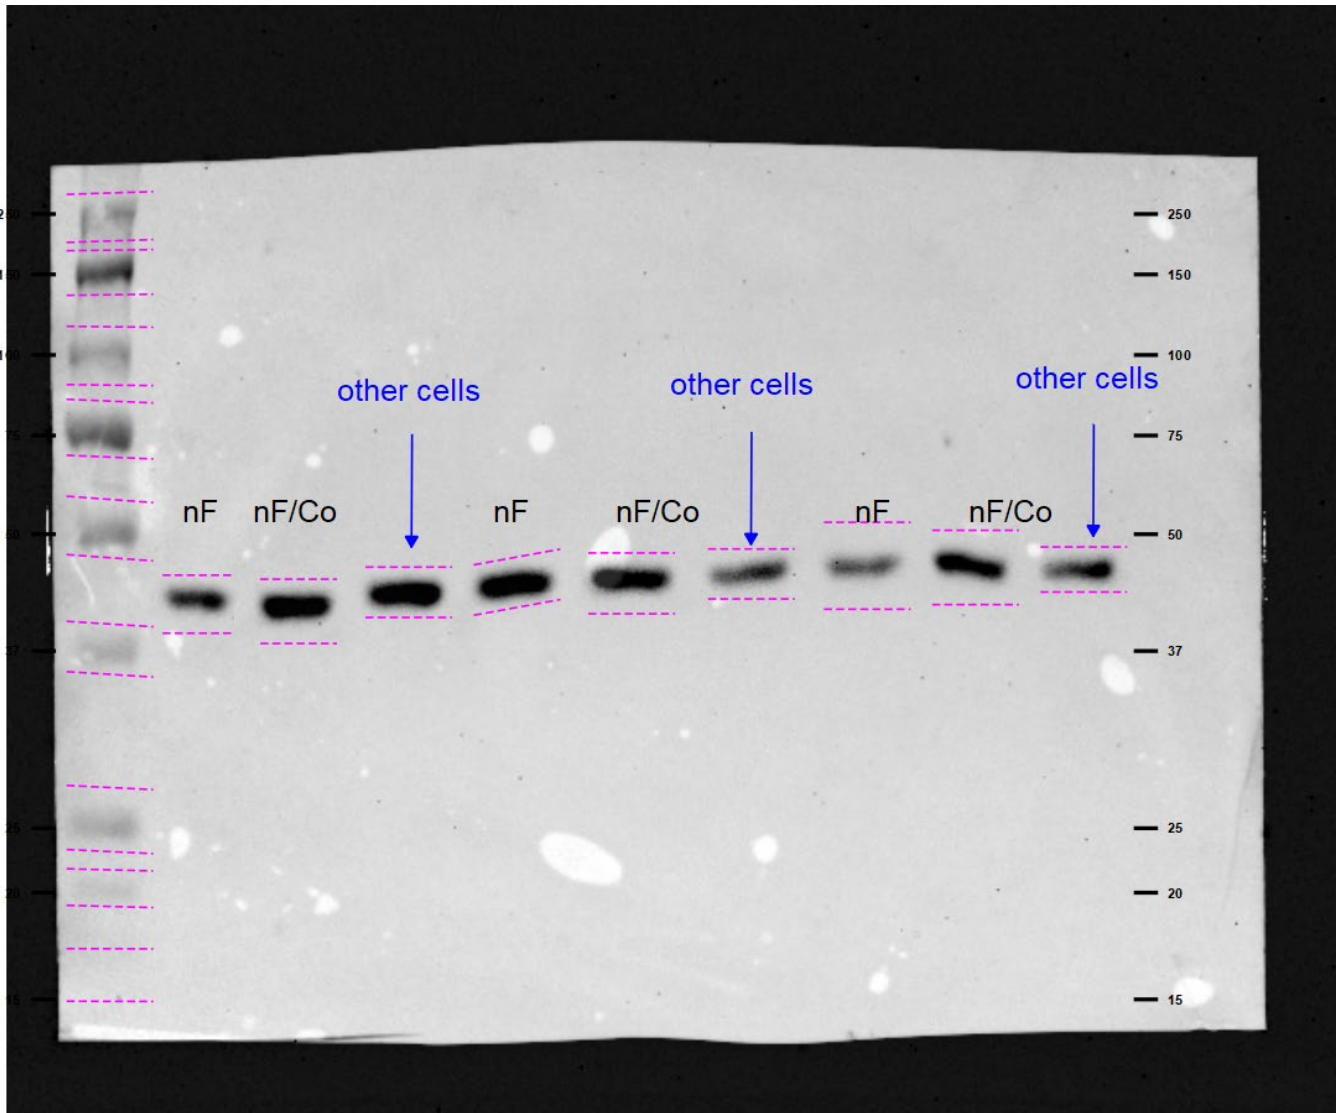

$\alpha$ SMA: Blot 2

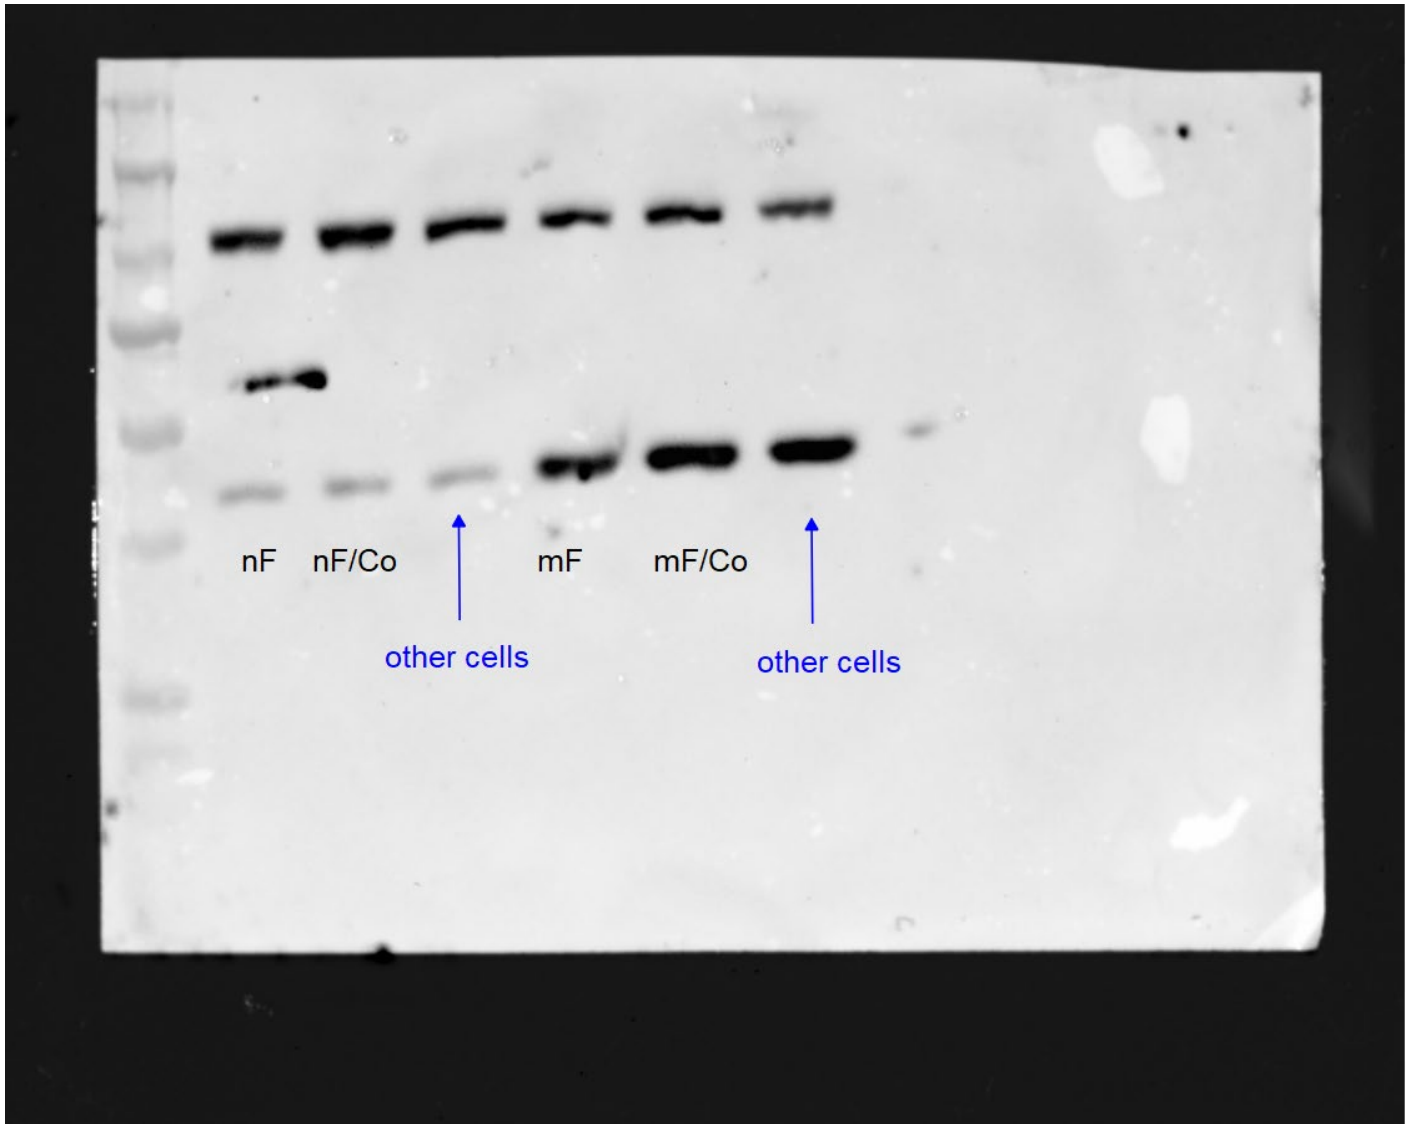



**αSMA : Blot 3**

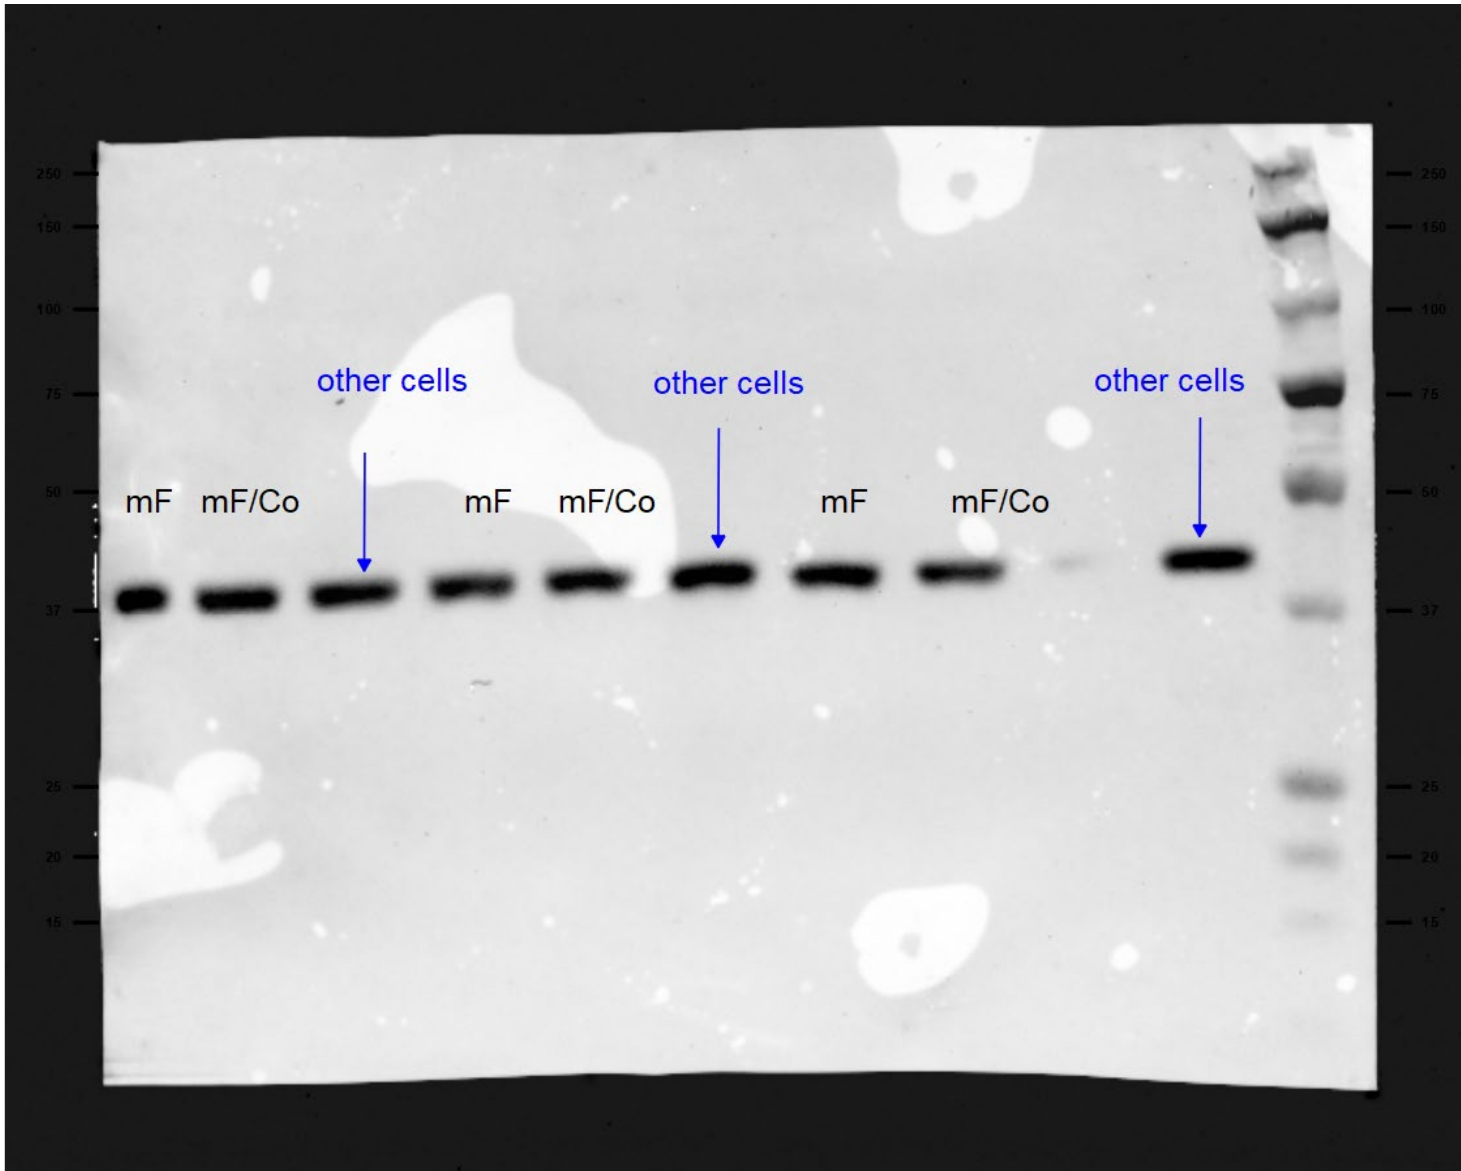



**HSC70 for blot 1  $\alpha$ SMA and blot 1 FAP**

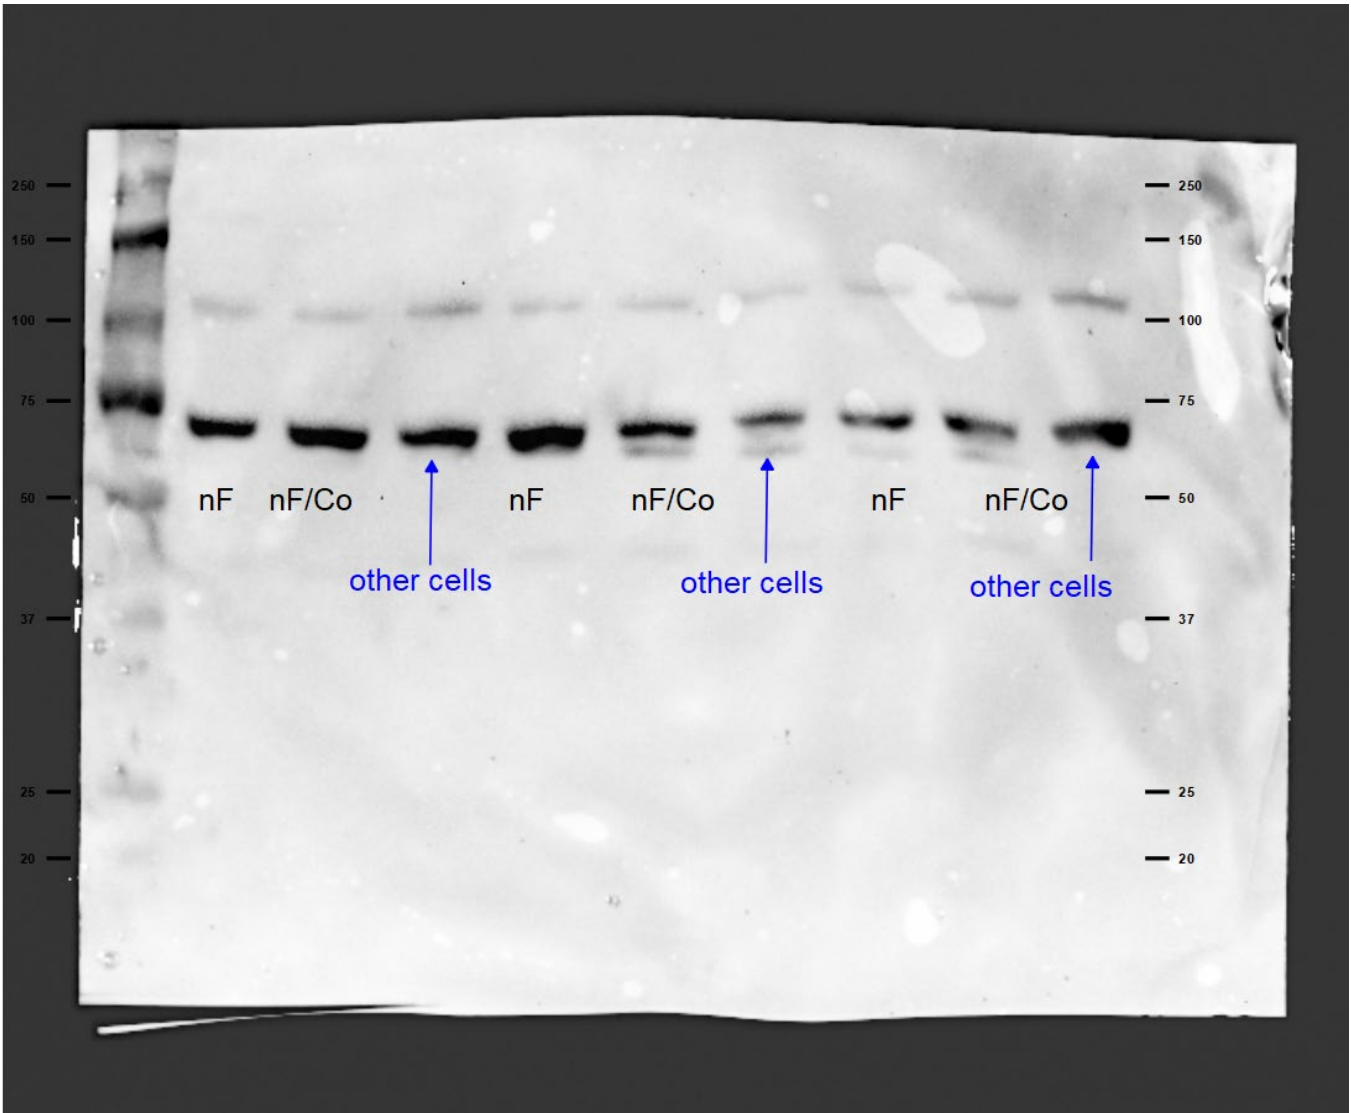

HSC70 for gel 2  $\alpha$ SMA and gel 2 FAP

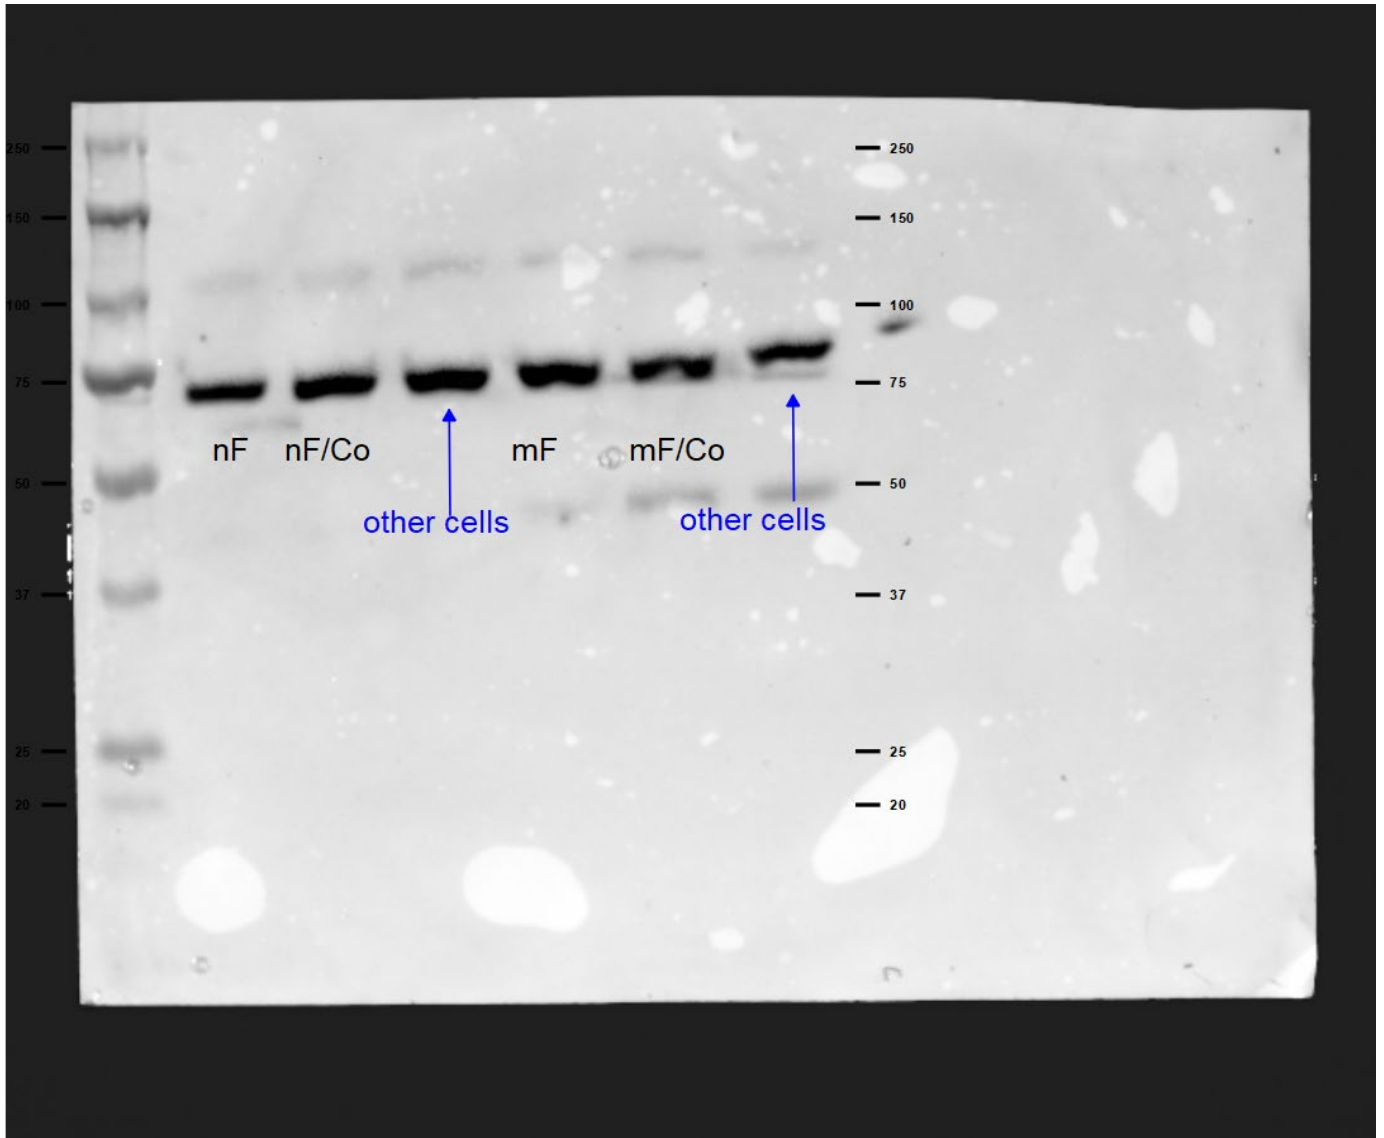

**HSC70 for blot 3  $\alpha$ SMA and blot 3 FAP**

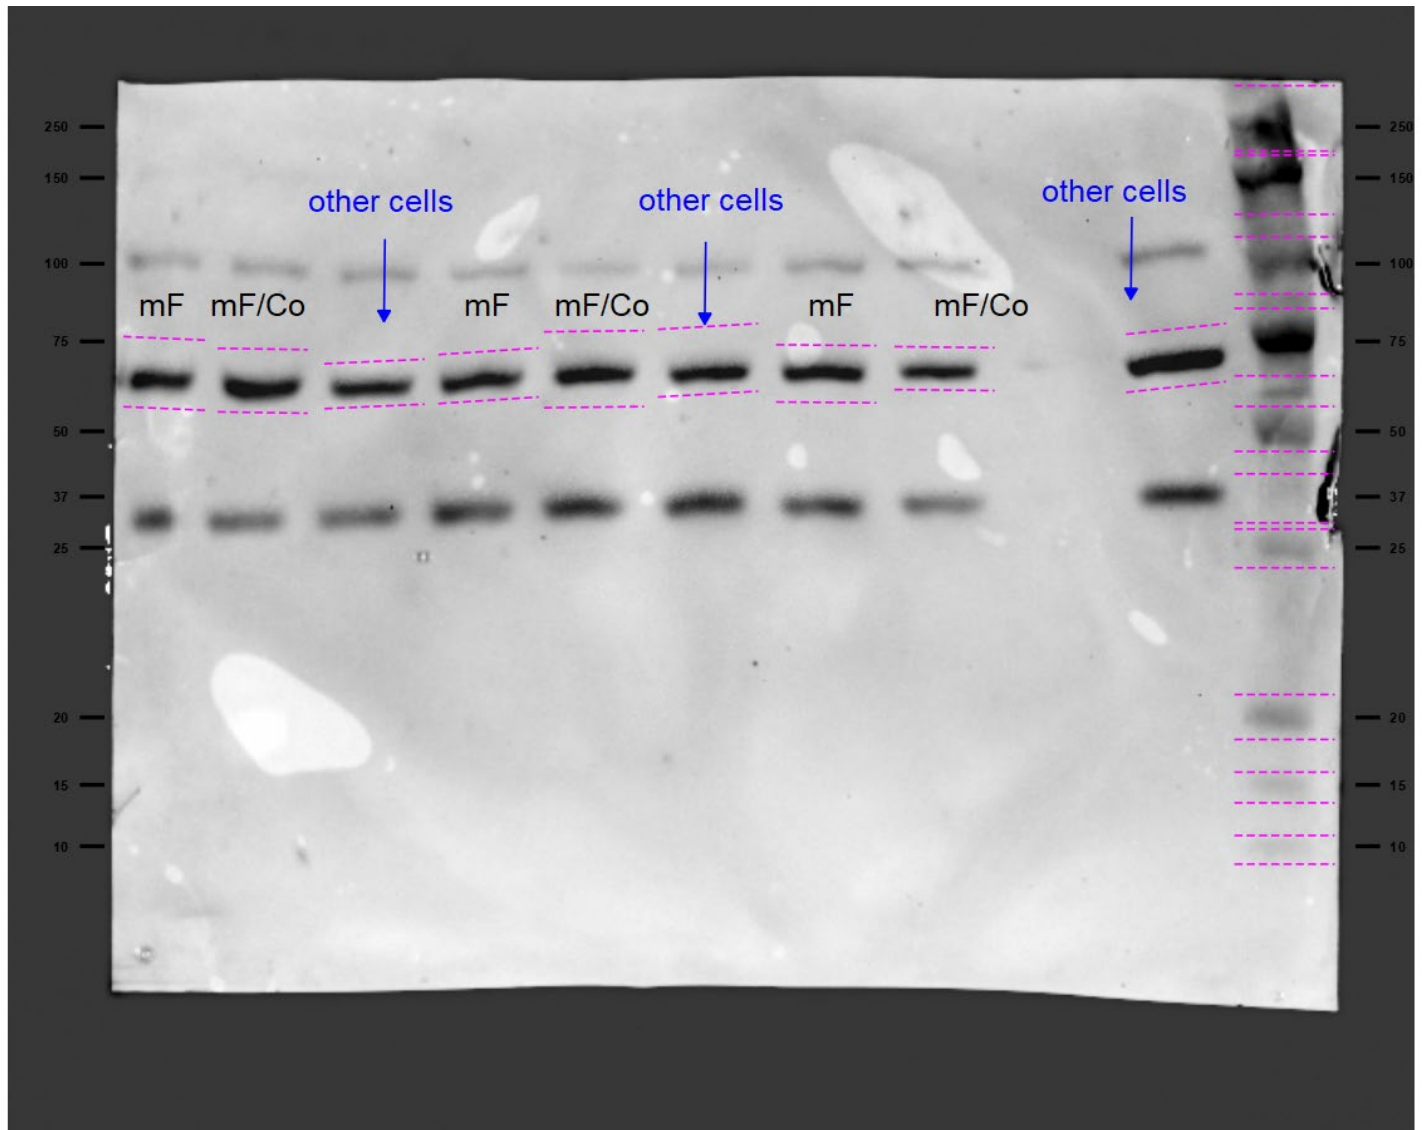

FAP

Blot 1 FAP

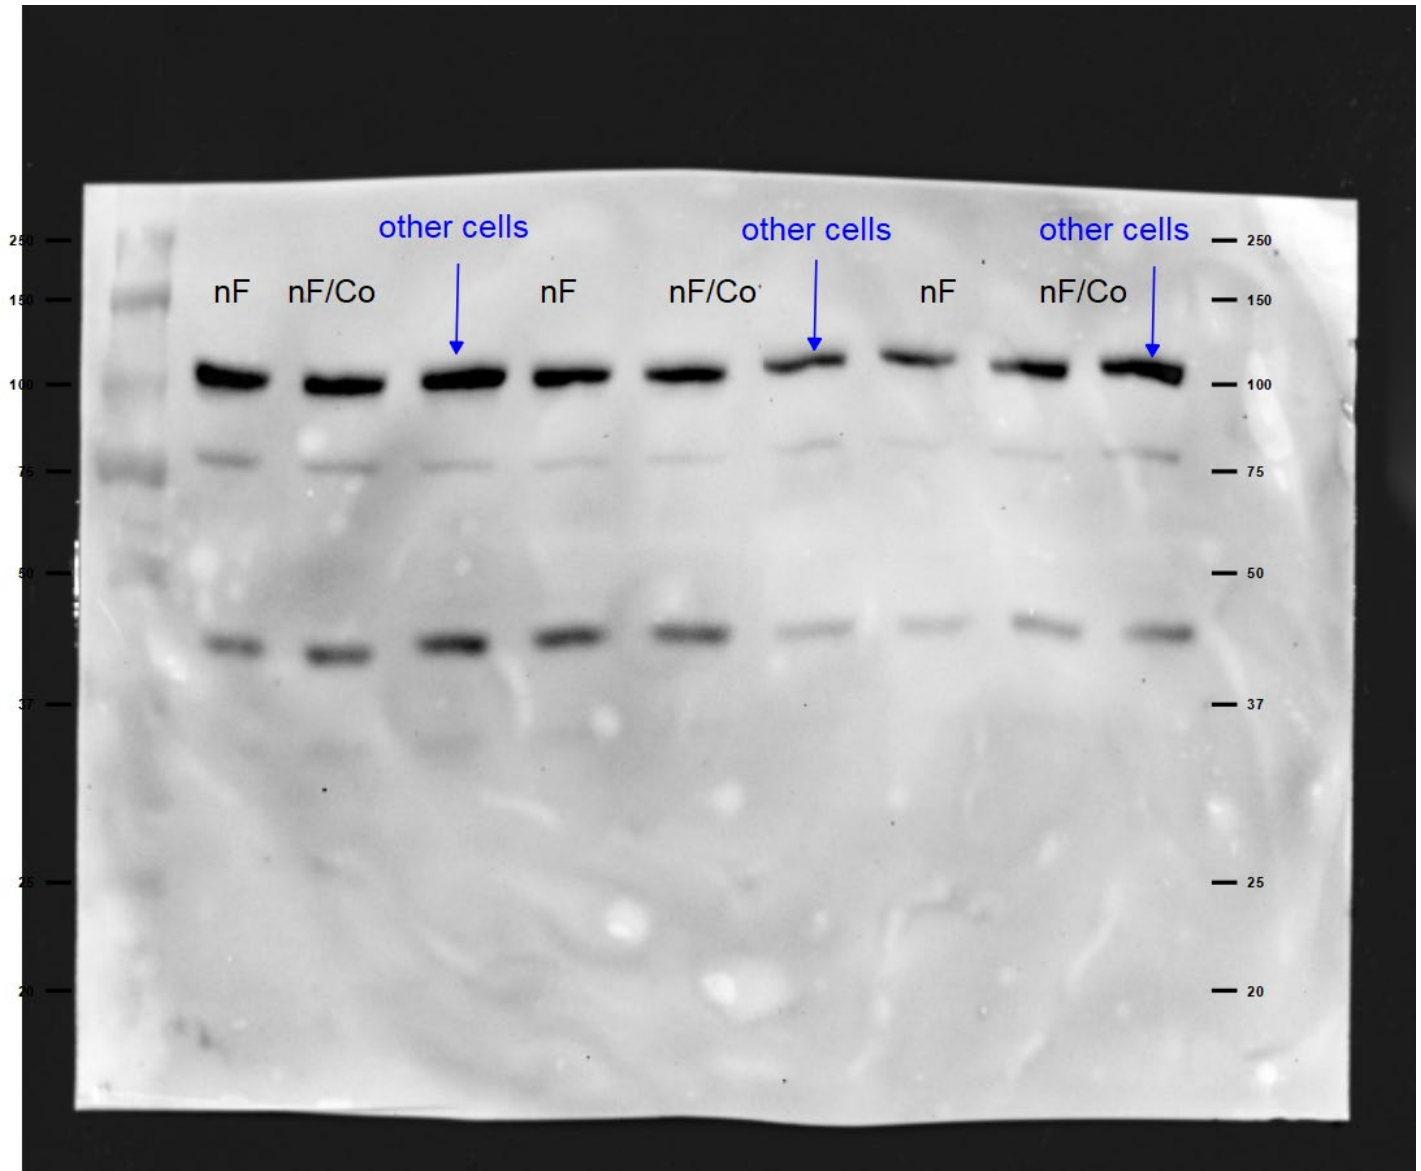

**Blot 2 FAP**

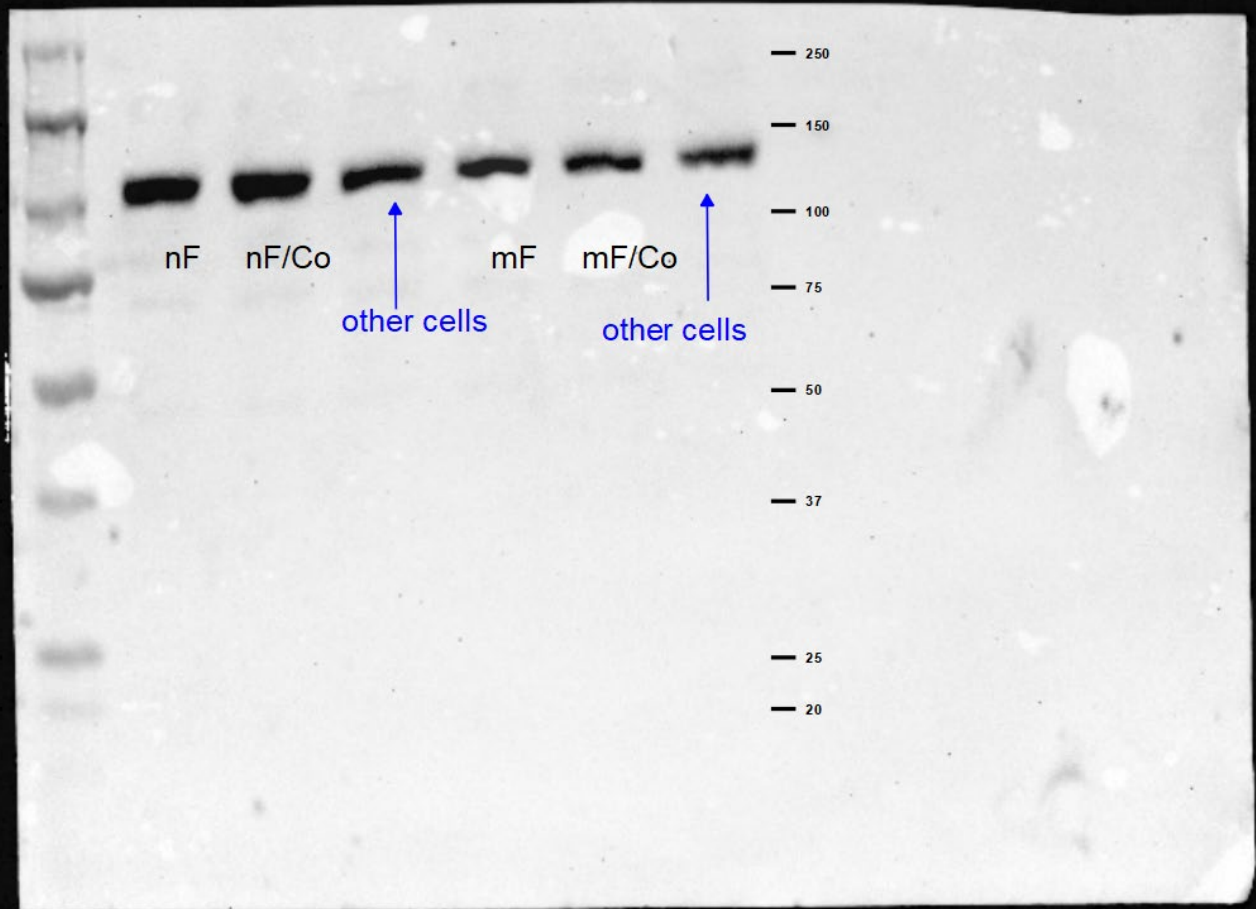

**Blot 3 FAP**

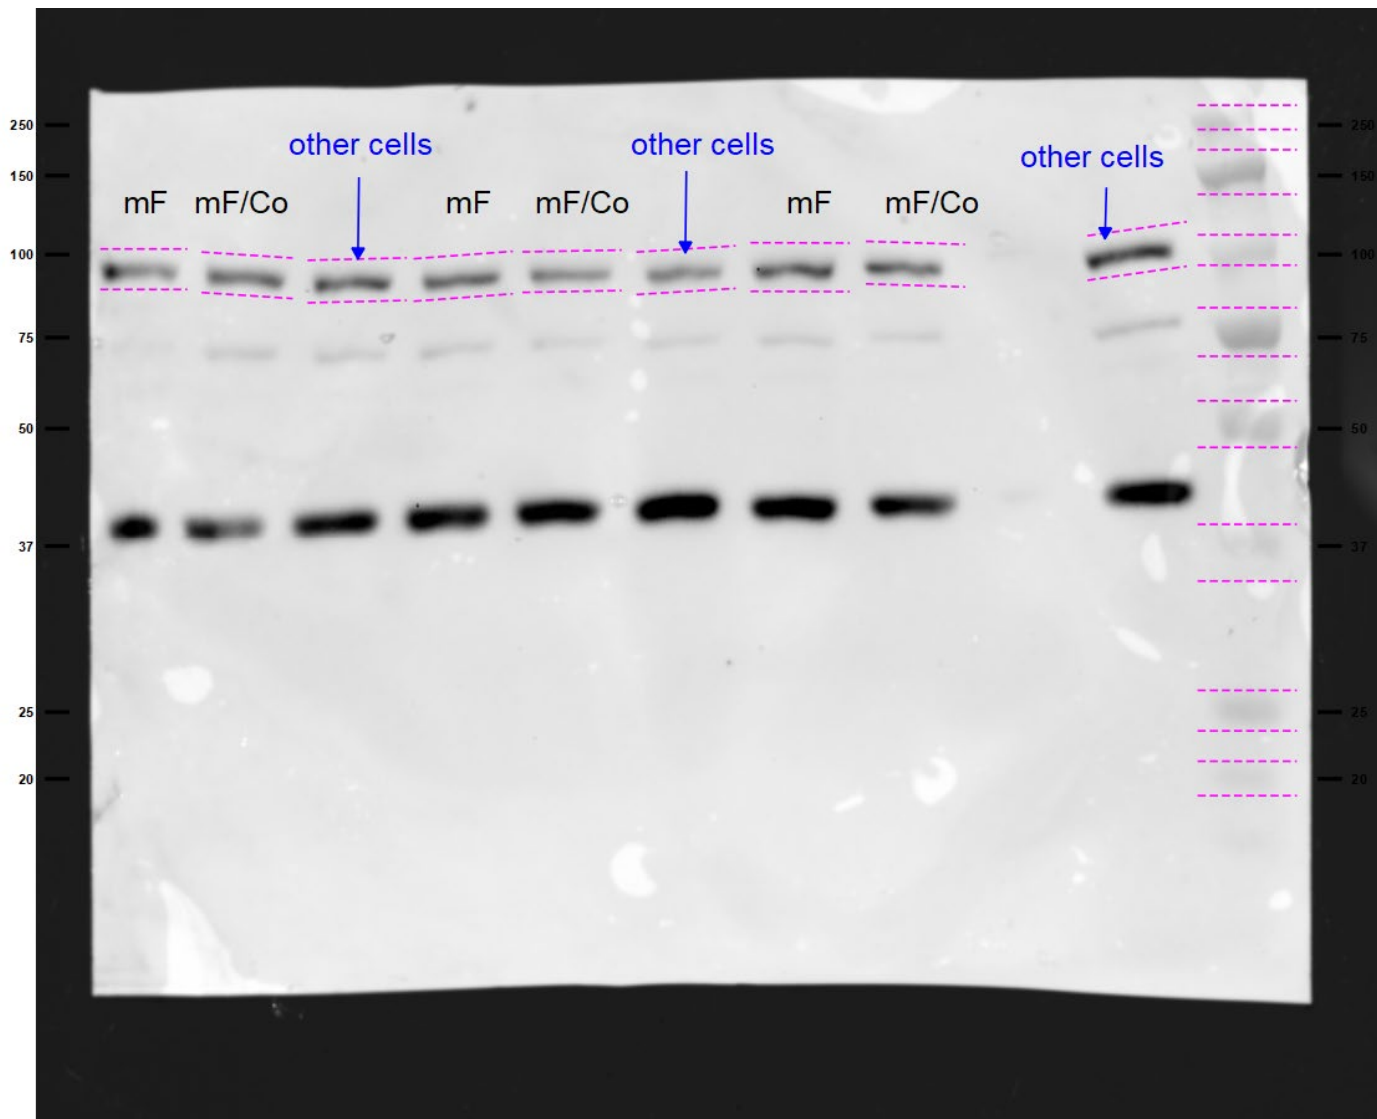

APC mutation

Blot 1

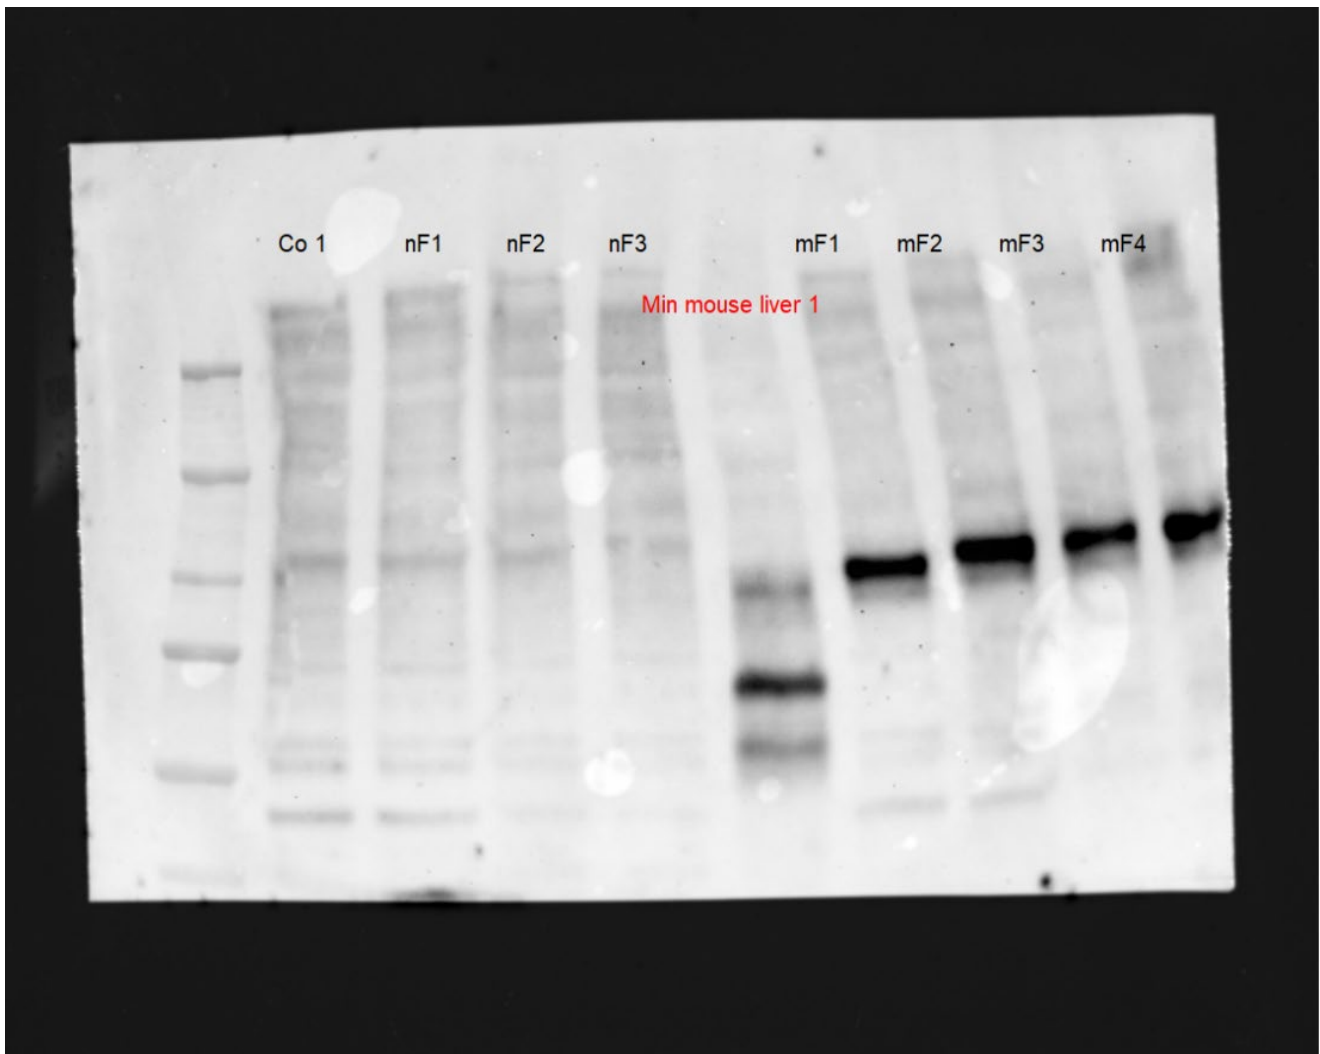

Blot 2

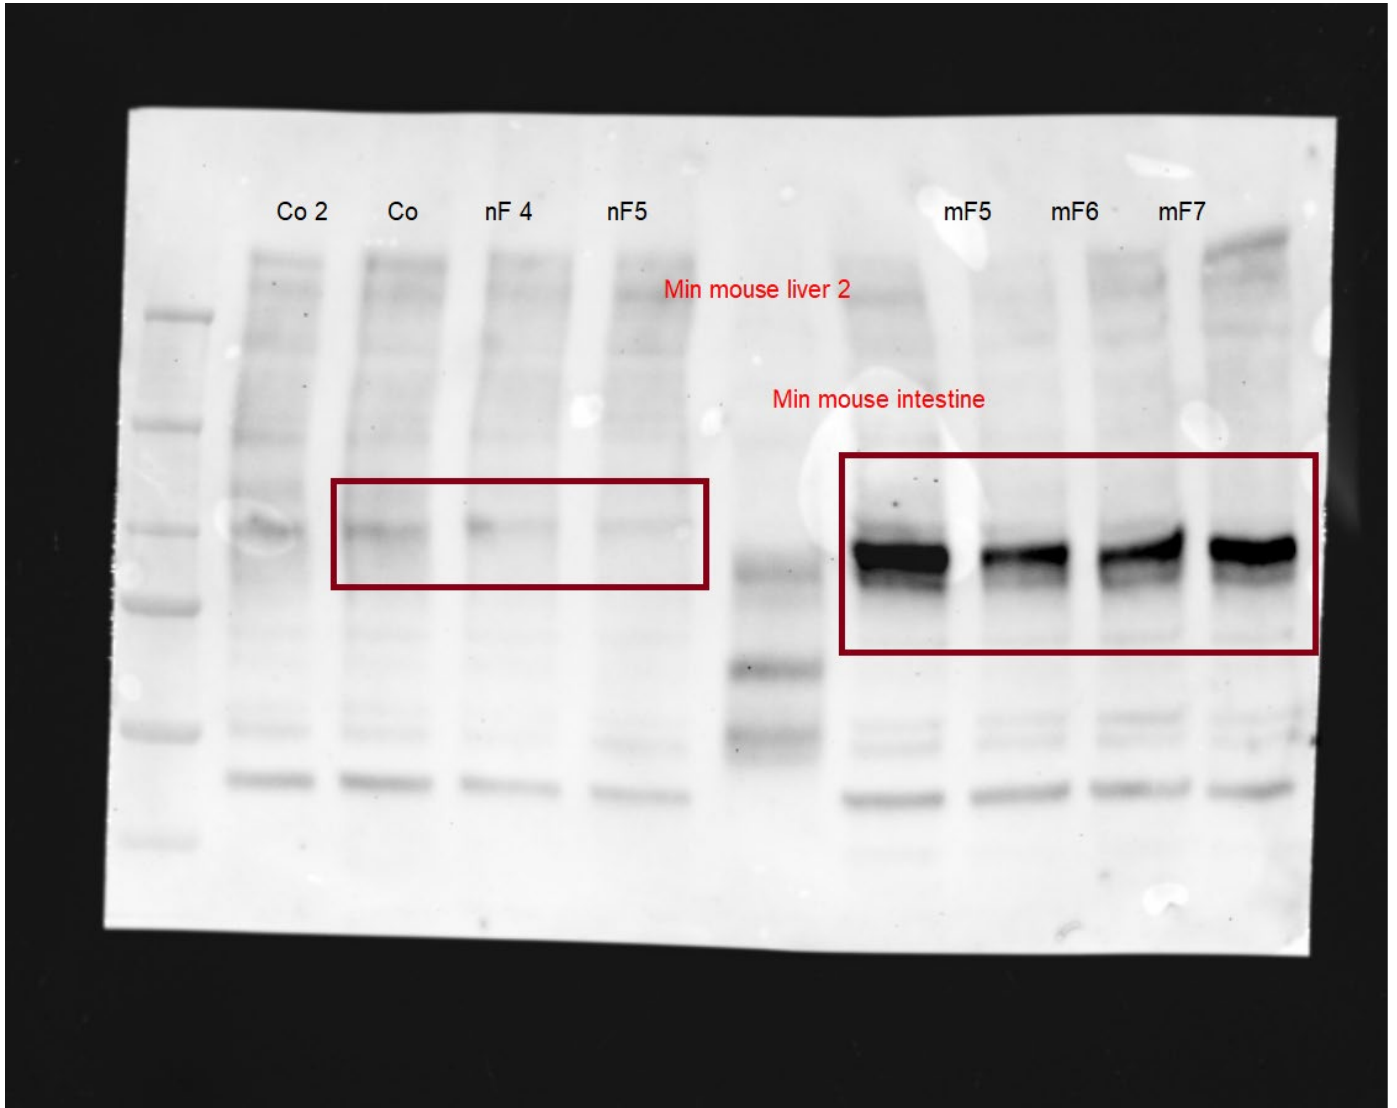



Blot 3

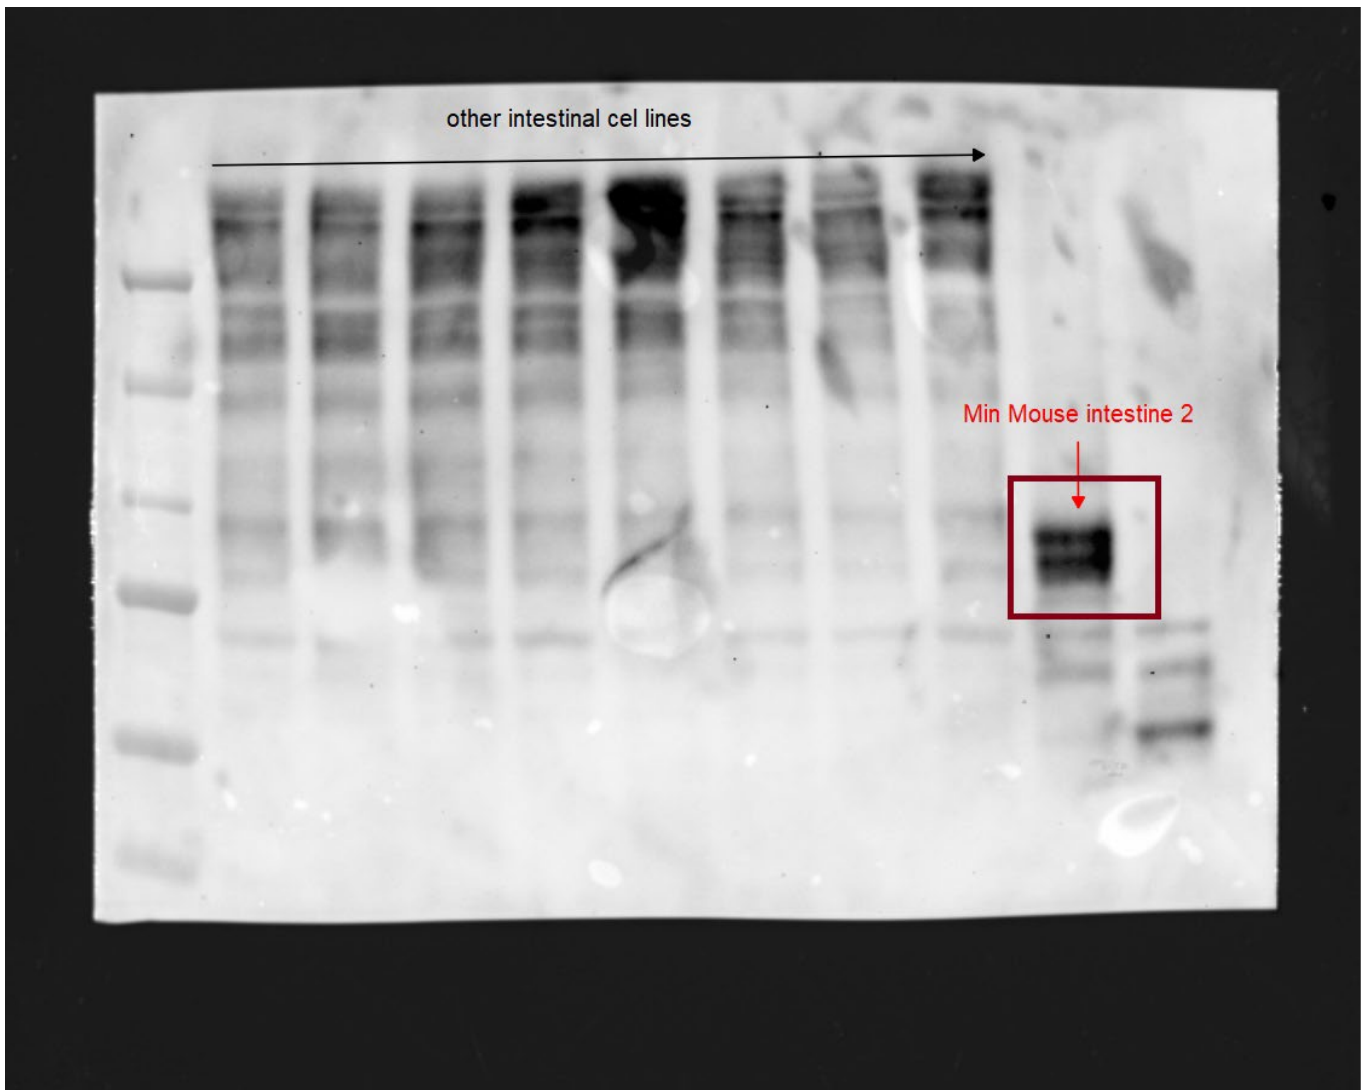

Supplement: pone.0273858.s013.pdf [file pone.0273858.s013.pdf]
